# Supplementary material for: ZBP1 Protects Against mtDNA-Induced Myocardial Inflammation in Failing Hearts
Source: PubMed Central journal article supplement — Circ Res. 2023 Mar 28;132(9):1110–26. doi: 10.1161/CIRCRESAHA.122.322227 (PMC10144299; doi:10.1161/circresaha.122.322227), 2023-03-28

Full unedited gel for Figure 1C. ZBP1

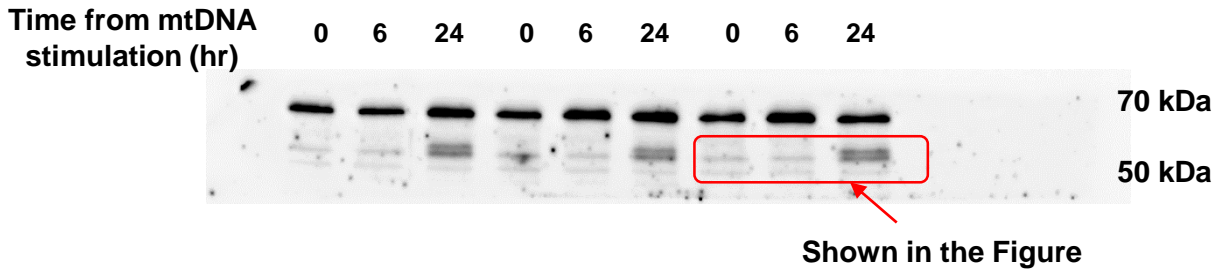

Full unedited gel for Figure 1C. GAPDH

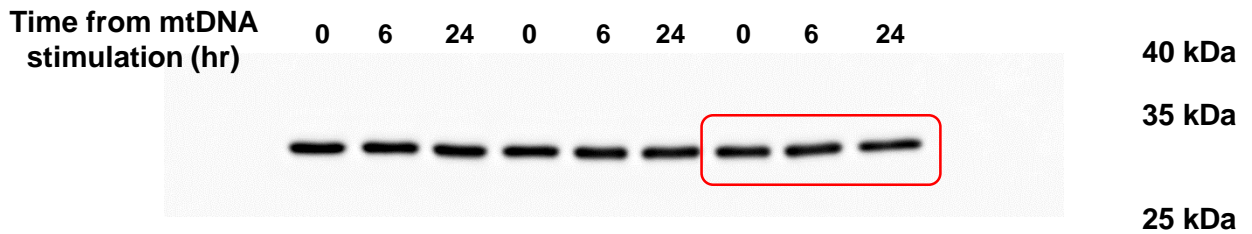

Full unedited gel for Figure 1F. LC3

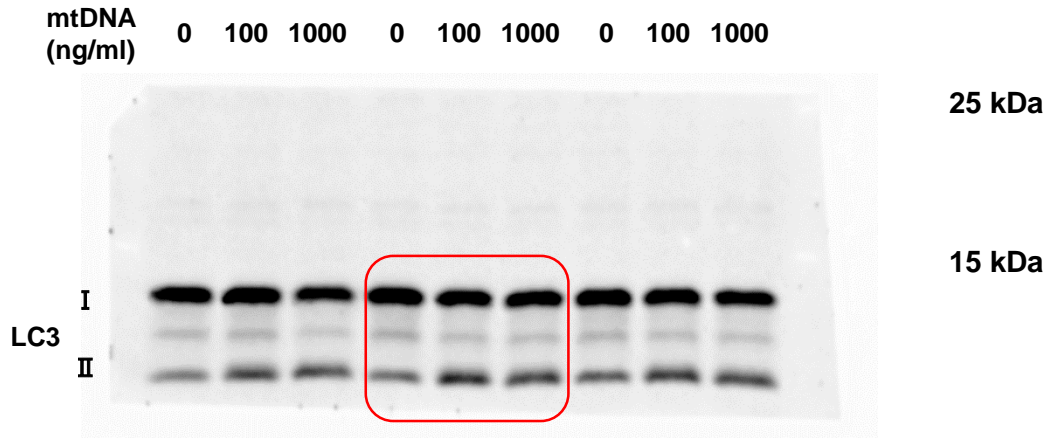

Full unedited gel for Figure 1F. ZBP1

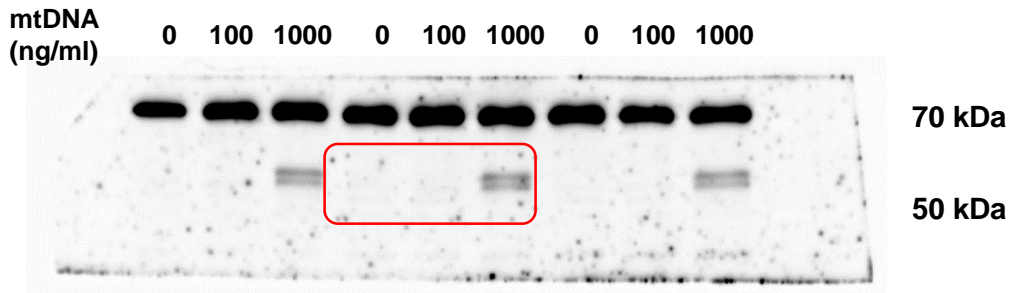

Full unedited gel for Figure 1F. RIPK3

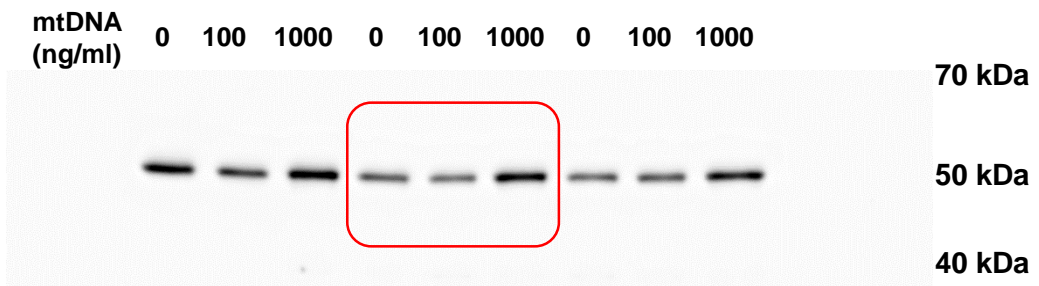

Full unedited gel for Figure 1F. pNF- $\kappa$ B (Ser 536)

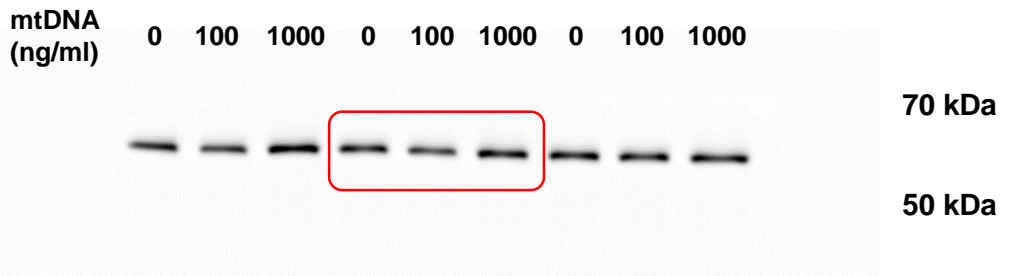

Full unedited gel for Figure 1F. NF- $\kappa$ B

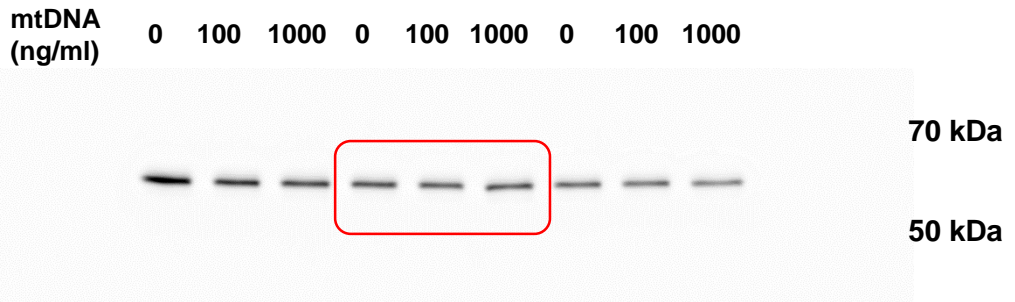

Full unedited gel for Figure 1F. NLRP3

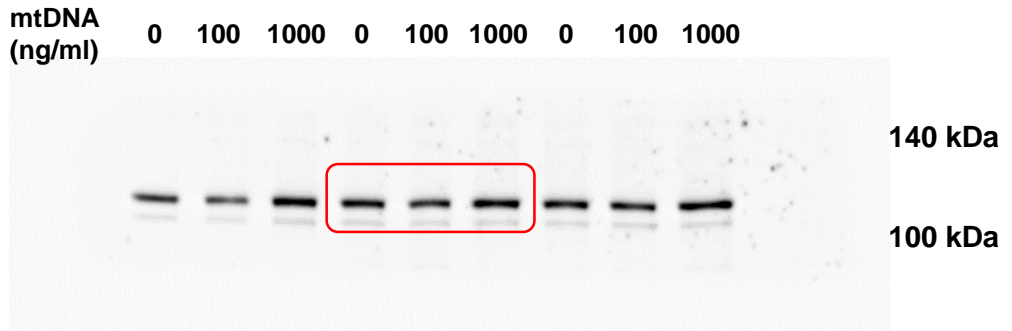

Full unedited gel for Figure 1F. TBK1

mtDNA  
(ng/ml)

0 100 1000 0 100 1000 0 100 1000

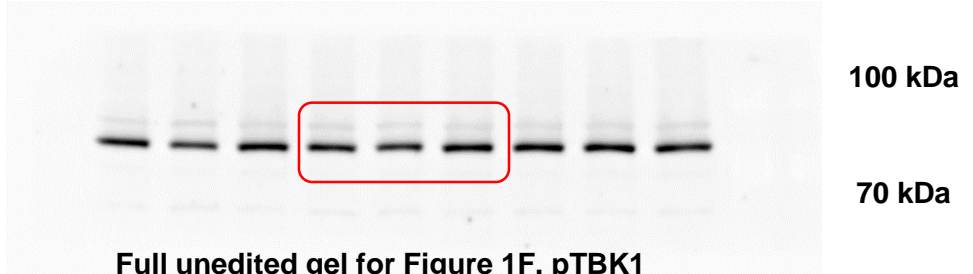

Full unedited gel for Figure 1F. pTBK1  
The order is the same as TBK1

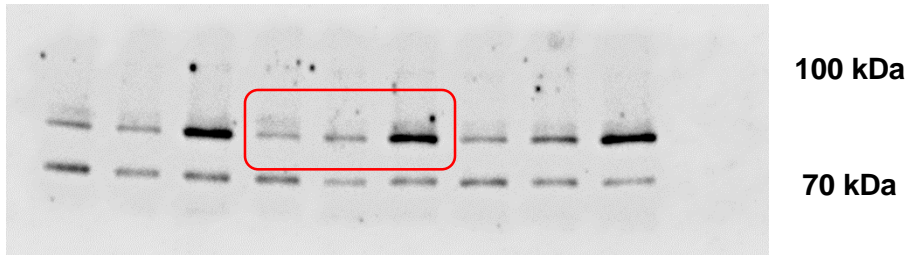

Full unedited gel for Figure 1F. GAPDH  
The order is the same as TBK1

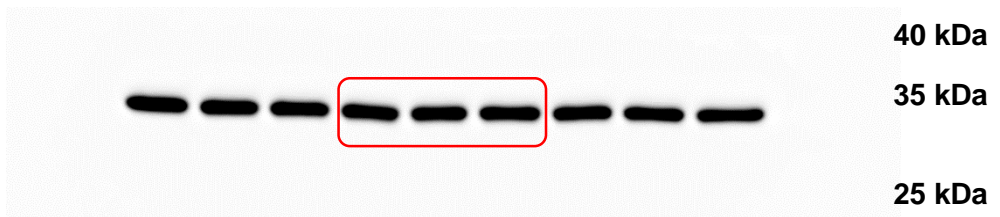

Full unedited gel for Figure 2B. ZBP1

|         |   |   |   |   |   |   |   |   |   |   |   |   |
|---------|---|---|---|---|---|---|---|---|---|---|---|---|
| mtDNA   | - | - | + | + | - | - | + | + | - | - | + | + |
| ZBP1 KD | - | + | - | + | - | + | - | + | - | + | - | + |

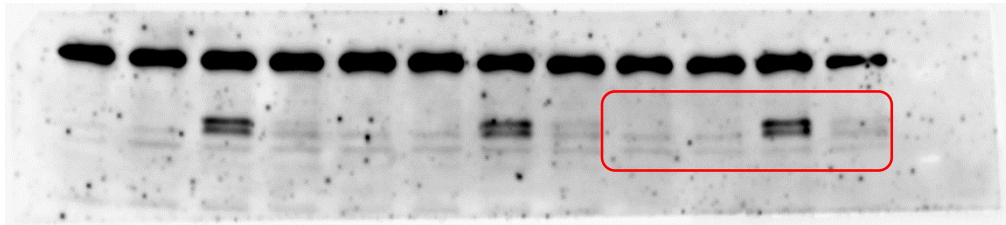

70 kDa

50 kDa

Full unedited gel for Figure 2B. RIPK3

The order is the same as ZBP1

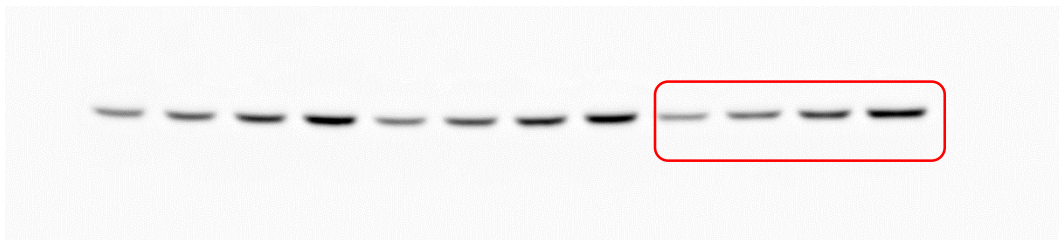

70 kDa

50 kDa

40 kDa

Full unedited gel for Figure 2B. pNF-κB (Ser 536)

|         |   |   |   |   |   |   |   |   |   |   |   |   |
|---------|---|---|---|---|---|---|---|---|---|---|---|---|
| mtDNA   | - | - | + | + | - | - | + | + | - | - | + | + |
| ZBP1 KD | - | + | - | + | - | + | - | + | - | + | - | + |

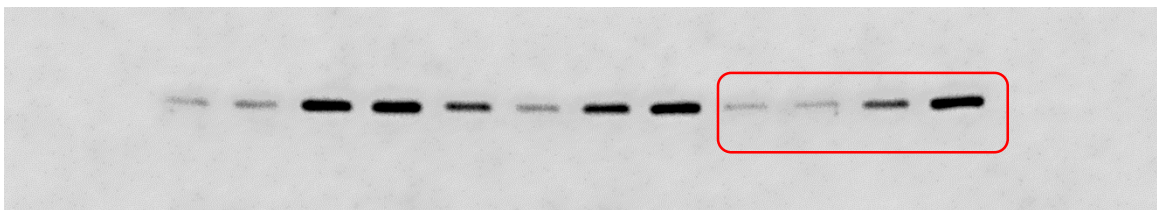

70 kDa

50 kDa

Full unedited gel for Figure 2B. NF-κB

The order is the same as pNF-κB (Ser 536)

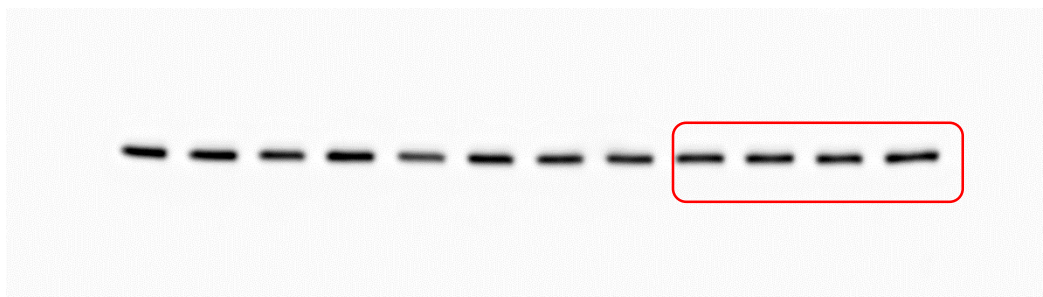

70 kDa

50 kDa

Full unedited gel for Figure 2B. NLRP3

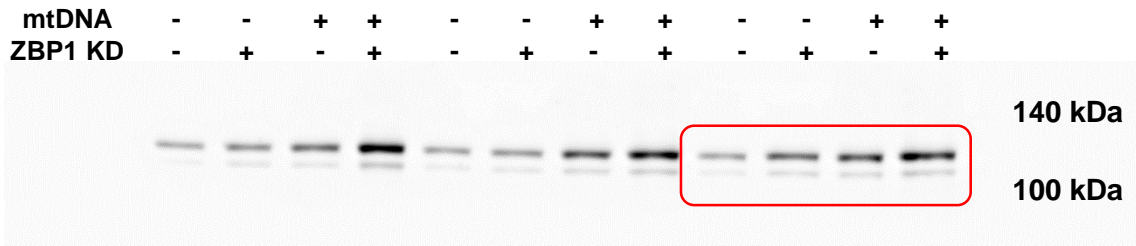

Full unedited gel for Figure 2B. GAPDH

The order is the same as NLRP3

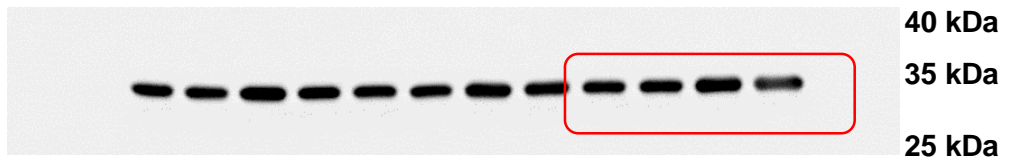



Full unedited gel for Figure 2D. TBK1

|         |   |   |   |   |   |   |   |   |   |   |   |   |
|---------|---|---|---|---|---|---|---|---|---|---|---|---|
| mtDNA   | - | - | + | + | - | - | + | + | - | - | + | + |
| ZBP1 KD | - | + | - | + | - | + | - | + | - | + | - | + |

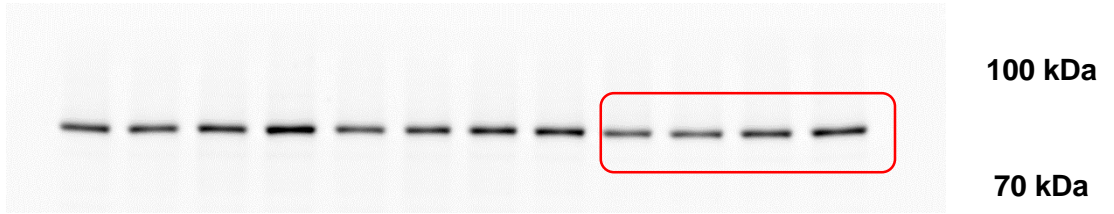

Full unedited gel for Figure 2D. pTBK1  
The order is the same as TBK1

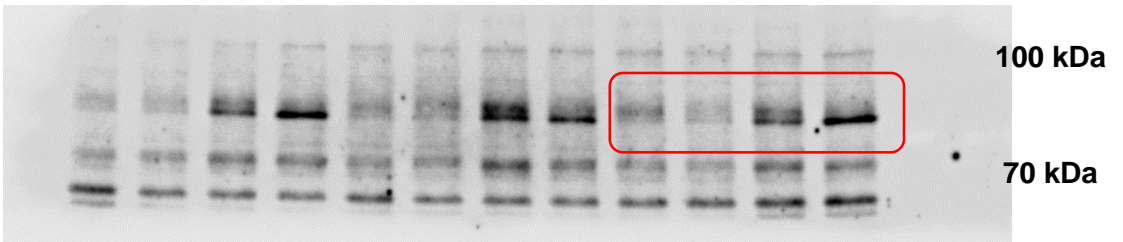

Full unedited gel for Figure 2D. GAPDH  
The order is the same as TBK1

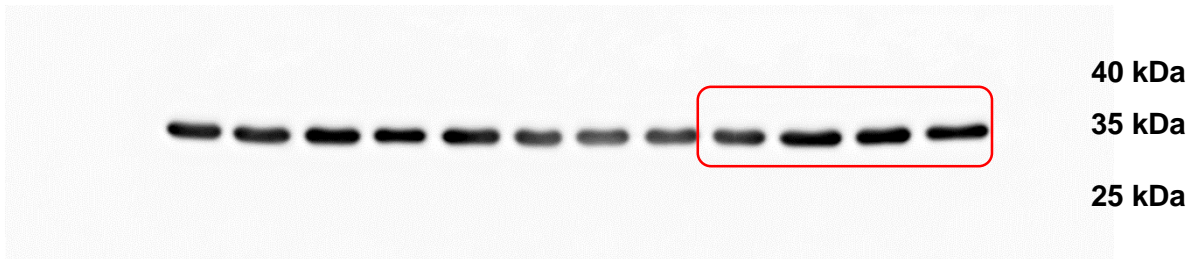

Full unedited gel for Figure 3A. ZBP1

|          |   |   |   |   |   |   |   |   |   |   |   |   |
|----------|---|---|---|---|---|---|---|---|---|---|---|---|
| mtDNA    | - | + | + | + | - | + | + | + | - | + | + | + |
| ZBP1 KD  | - | - | + | + | - | - | + | + | - | - | + | + |
| RIPK3 KD | - | - | - | + | - | - | - | + | - | - | - | + |

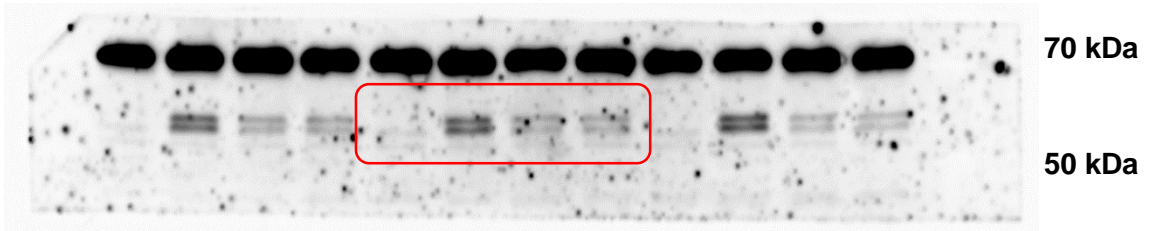

Full unedited gel for Figure 3A. RIPK3  
The order is the same as ZBP1

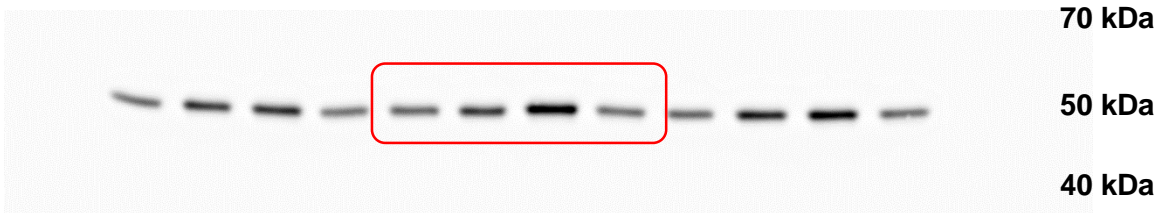

Full unedited gel for Figure 3A. pNF-κB (Ser 536)  
The order is the same as ZBP1

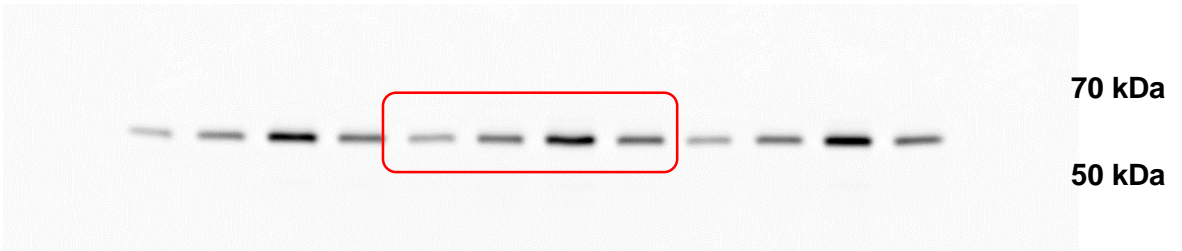

Full unedited gel for Figure 3A. NF-κB  
The order is the same as ZBP1

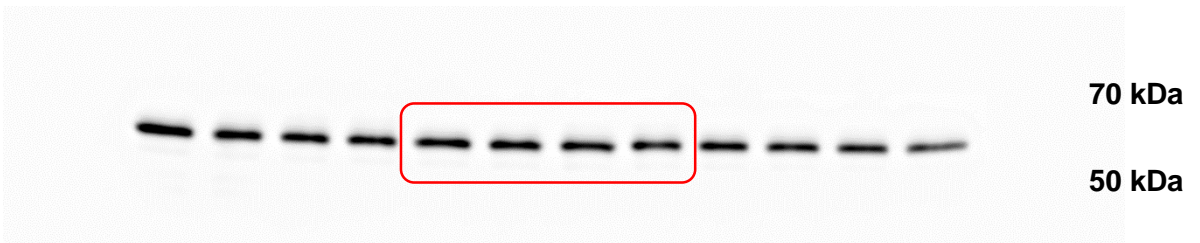



Full unedited gel for Figure 3A. NLRP3

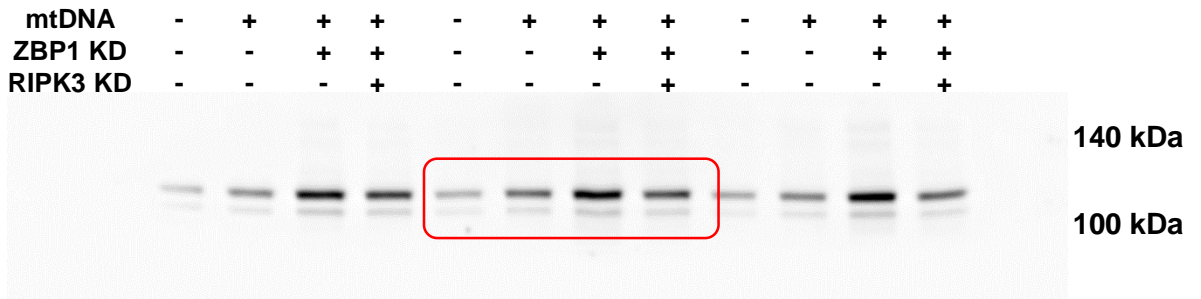

Full unedited gel for Figure 3A. GAPDH  
The order is the same as NLRP3

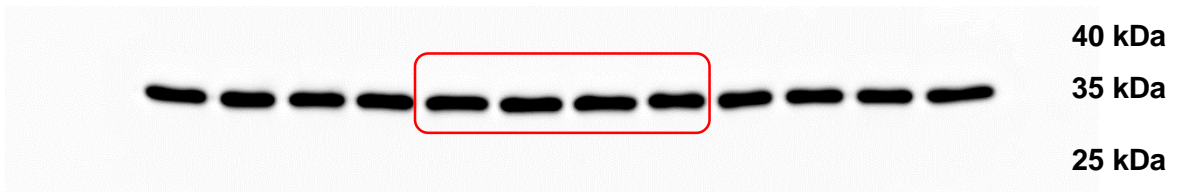

**Full unedited gel for Figure 4A. ZBP1**

|          |   |   |   |   |   |   |   |   |   |   |   |   |
|----------|---|---|---|---|---|---|---|---|---|---|---|---|
| mtDNA    | - | + | + | + | - | + | + | + | - | + | + | + |
| ZBP1 KD  | - | - | + | + | - | - | + | + | - | - | + | + |
| NF-κB KD | - | - | - | + | - | - | - | + | - | - | - | + |

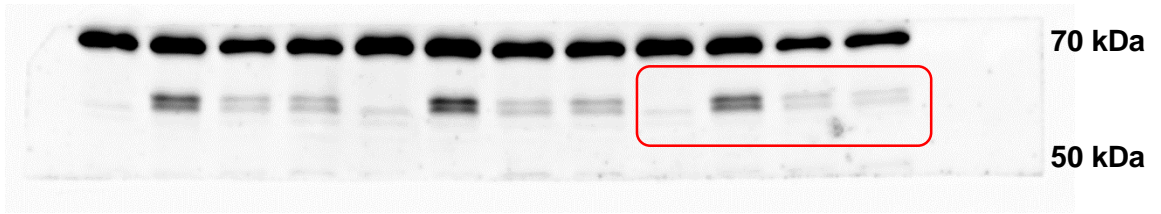

**Full unedited gel for Figure 4A. RIPK3**

The order is the same as ZBP1

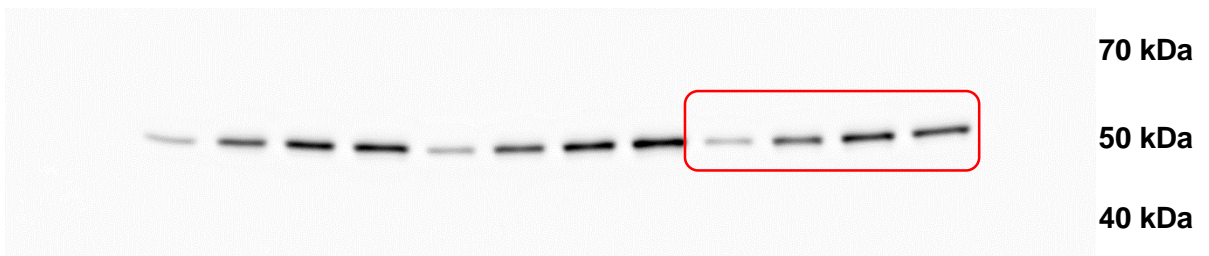

**Full unedited gel for Figure 4A. pNF-κB (Ser 536)**

The order is the same as ZBP1

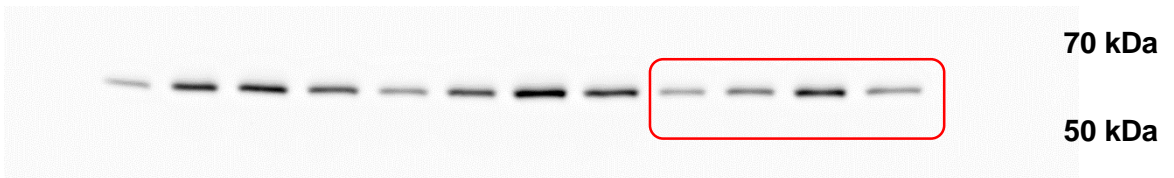

**Full unedited gel for Figure 4A. NF-κB**

The order is the same as ZBP1

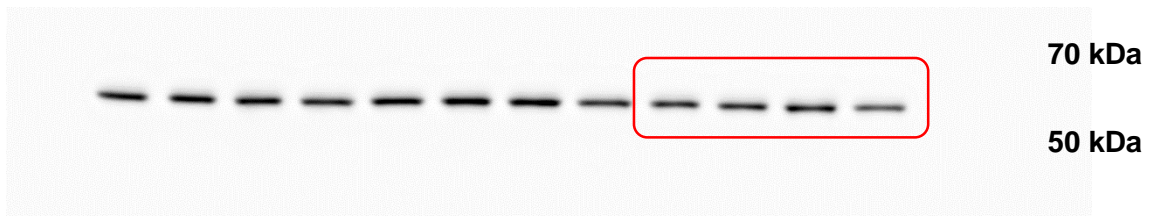

Full unedited gel for Figure 4A. NLRP3

|                   |   |   |   |   |   |   |   |   |   |   |   |   |
|-------------------|---|---|---|---|---|---|---|---|---|---|---|---|
| mtDNA             | - | + | + | + | - | + | + | + | - | + | + | + |
| ZBP1 KD           | - | - | + | + | - | - | + | + | - | - | + | + |
| NF- $\kappa$ B KD | - | - | - | + | - | - | - | + | - | - | - | + |

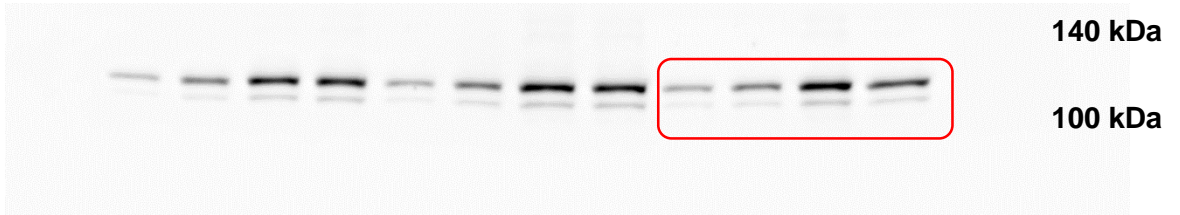

Full unedited gel for Figure 4A. GAPDH  
The order is the same as NLRP3

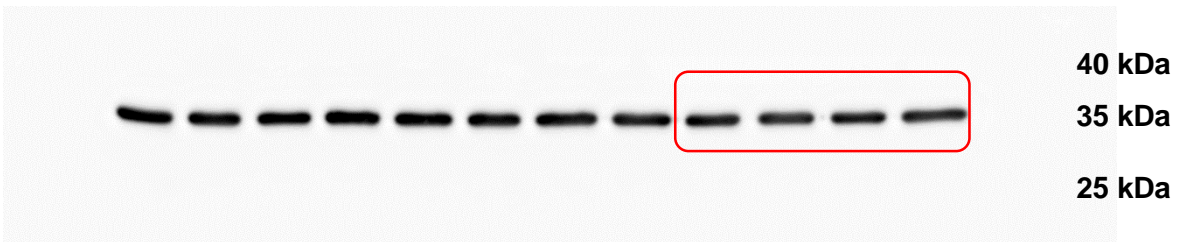

Full unedited gel for Figure 5C. ZBP1

|         |   |   |   |   |   |   |   |   |   |   |   |   |
|---------|---|---|---|---|---|---|---|---|---|---|---|---|
| CpG-ODN | - | - | + | + | - | - | + | + | - | - | + | + |
| ZBP1 KD | - | + | - | + | - | + | - | + | - | + | - | + |

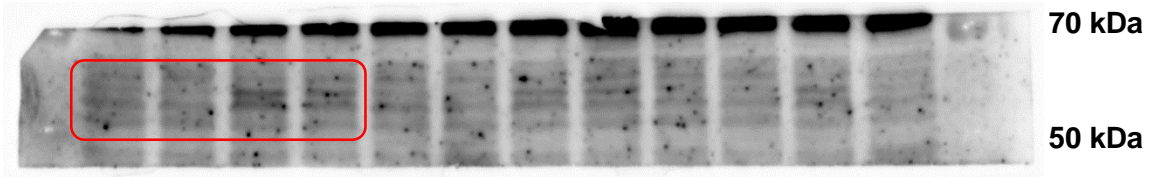

Full unedited gel for Figure 5C. GAPDH  
The order is the same as ZBP1

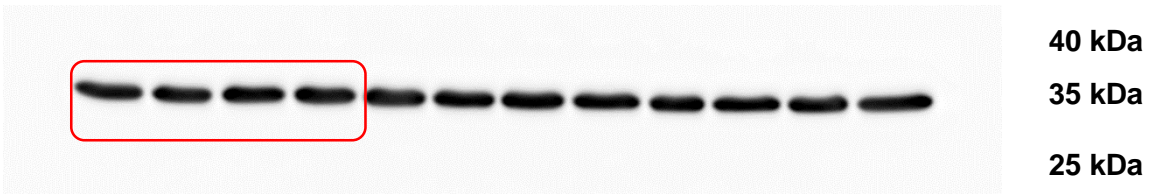

Full unedited gel for Figure 5E. RIPK3

CpG-ODN

- + - + - +

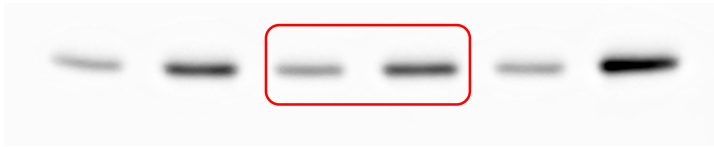

70 kDa

50 kDa

40 kDa

Full unedited gel for Figure 5E. GAPDH  
The order is the same as RIPK3

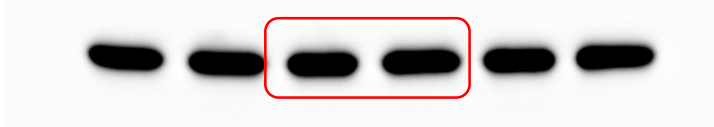

40 kDa

35 kDa

25 kDa

Full unedited gel for Figure 5H. ZBP1

|         |   |   |   |   |   |   |   |   |   |   |   |   |
|---------|---|---|---|---|---|---|---|---|---|---|---|---|
| mtDNA   | - | - | + | + | - | - | + | + | - | - | + | + |
| TLR9 KD | - | + | - | + | - | + | - | + | - | + | - | + |

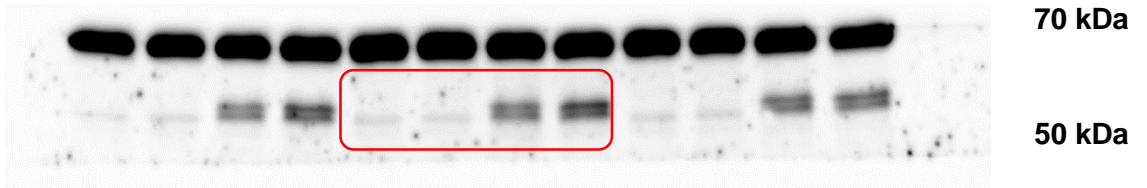

Full unedited gel for Figure 5H. GAPDH  
The order is the same as ZBP1

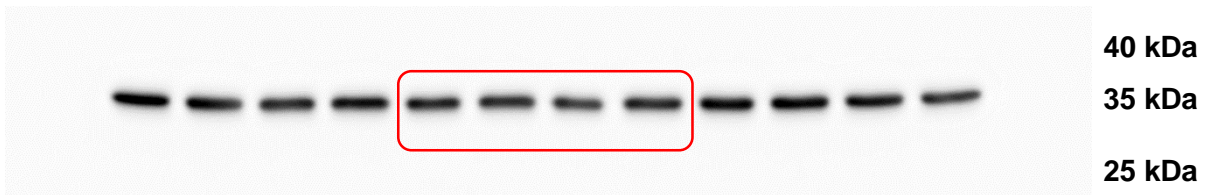



Full unedited gel for Figure 5I. ZBP1

|         |   |   |   |   |   |   |   |   |   |   |   |   |
|---------|---|---|---|---|---|---|---|---|---|---|---|---|
| CpG-ODN | - | - | + | + | - | - | + | + | - | - | + | + |
| TLR9 KD | - | + | - | + | - | + | - | + | - | + | - | + |

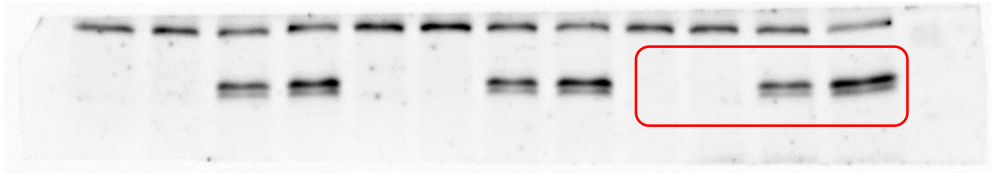

70 kDa

50 kDa

Full unedited gel for Figure 5I. GAPDH

The order is the same as ZBP1

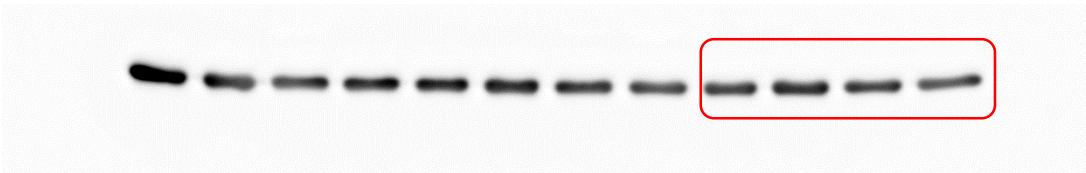

40 kDa

35 kDa

25 kDa

**Full unedited gel for Figure 6A. ZBP1**

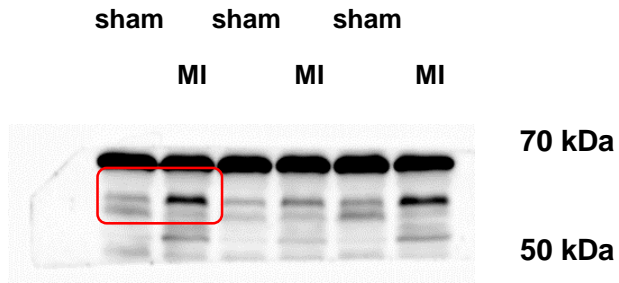

**Full unedited gel for Figure 6A. GAPDH**  
The order is the same as ZBP1

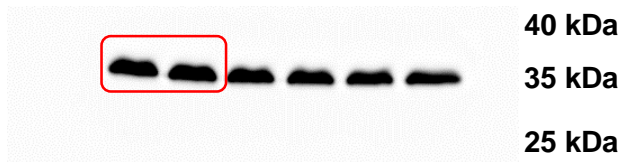

Full unedited gel for Figure 6B. COX4

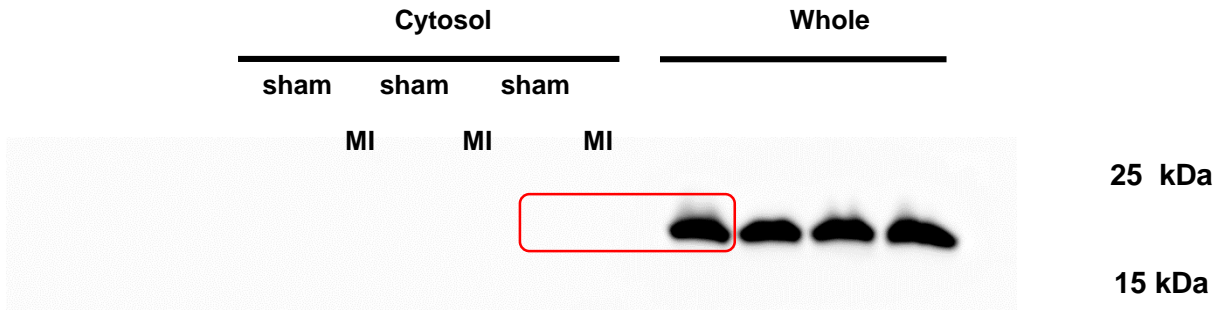

Full unedited gel for Figure 6B. LC3  
The order is the same as COX4

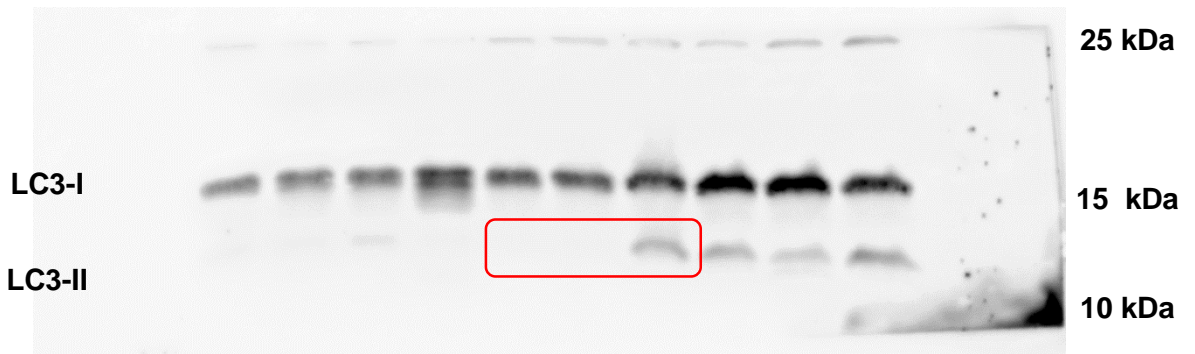

Full unedited gel for Figure 6B. GAPDH  
The order is the same as COX4

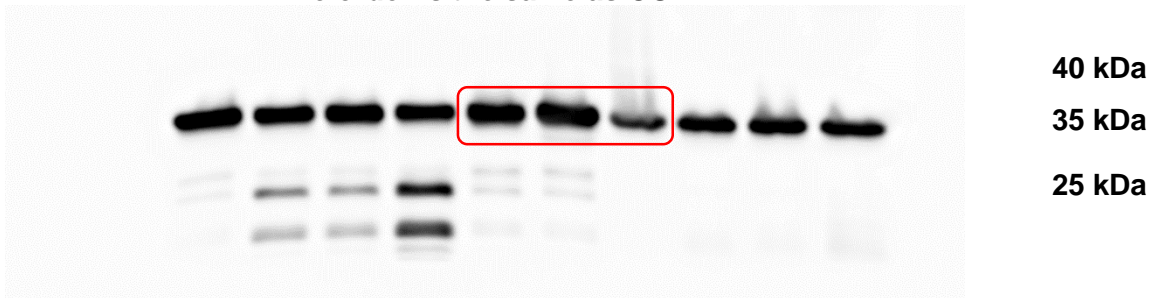

**Full unedited gel for Figure 6C. ZBP1**

WT KO WT KO WT KO WT KO WT KO WT KO  
Sham Sham MI MI Sham Sham MI MI Sham Sham MI MI

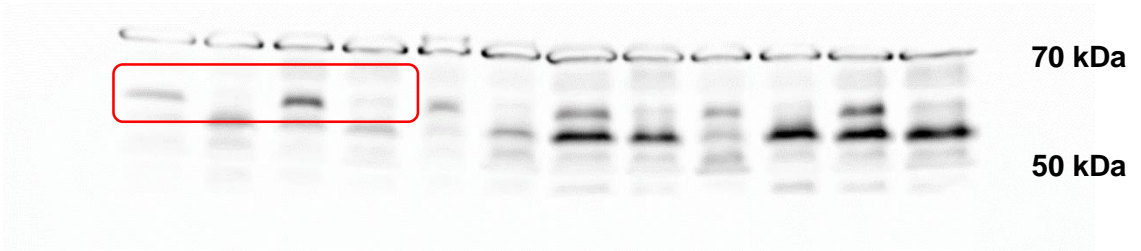

**Full unedited gel for Figure 6C. RIPK3**  
The order is the same as ZBP1

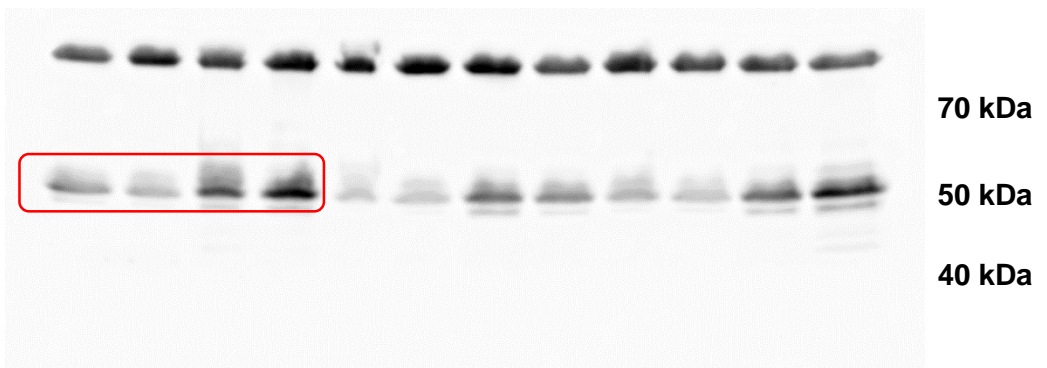

**Full unedited gel for Figure 6C. pNF- $\kappa$ B (Ser 536)**  
The order is the same as ZBP1

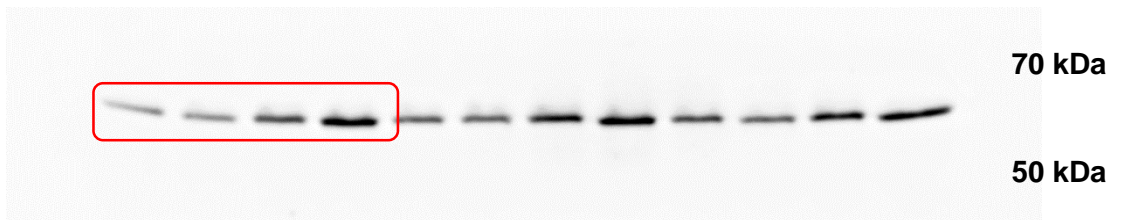

**Full unedited gel for Figure 6C. NF- $\kappa$ B**  
The order is the same as ZBP1

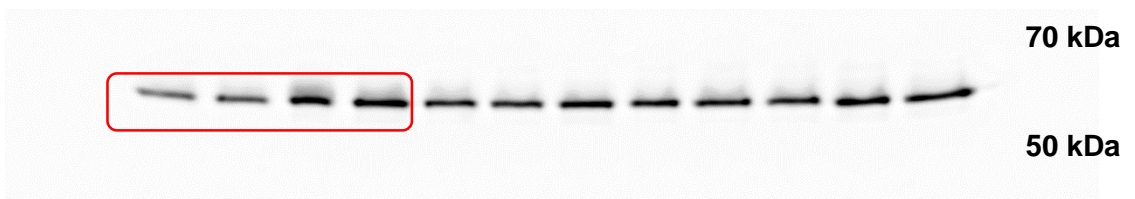

Full unedited gel for Figure 6C. NLRP3

WT KO WT KO WT KO WT KO WT KO WT KO  
Sham Sham MI MI Sham Sham MI MI Sham Sham MI MI

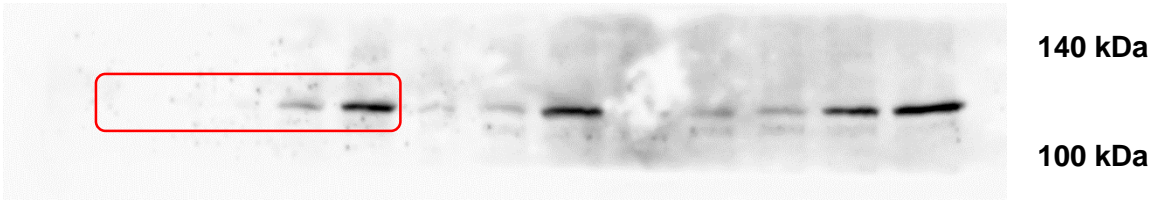

Full unedited gel for Figure 6C. GAPDH  
The order is the same as NLRP3

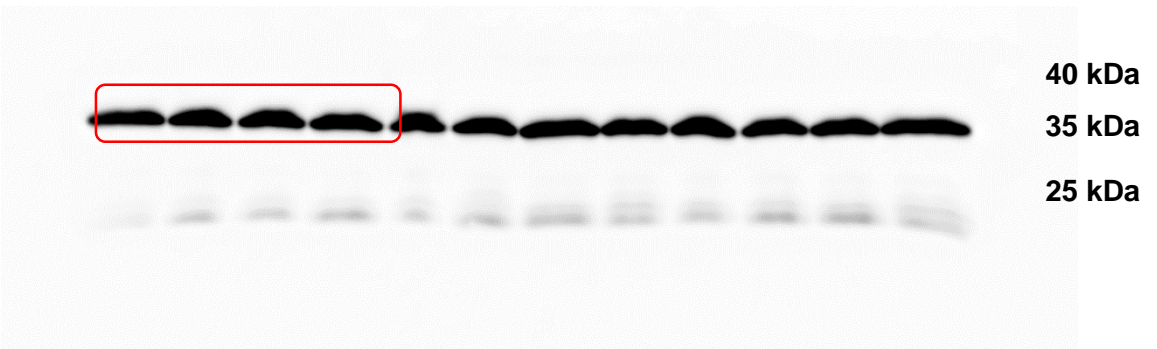

**Full unedited gel for Figure 6F. TBK1**

WT KO WT KO WT KO WT KO WT KO WT KO  
Sham Sham MI MI Sham Sham MI MI Sham Sham MI MI

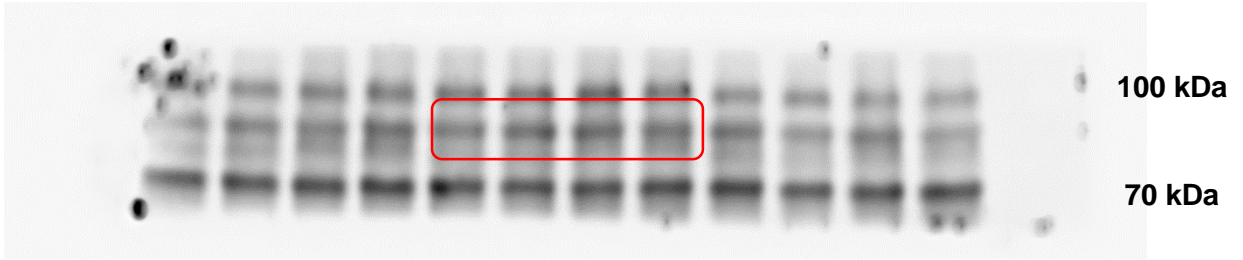

**Full unedited gel for Figure 6F. pTBK1**  
The order is the same as TBK1

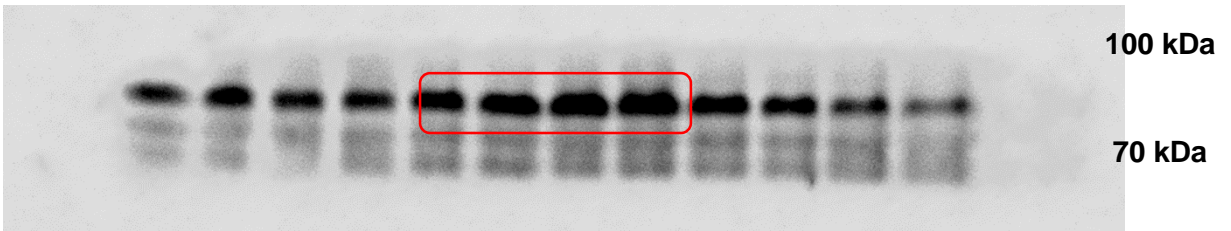

**Full unedited gel for Figure 6F. GAPDH**  
The order is the same as TBK1

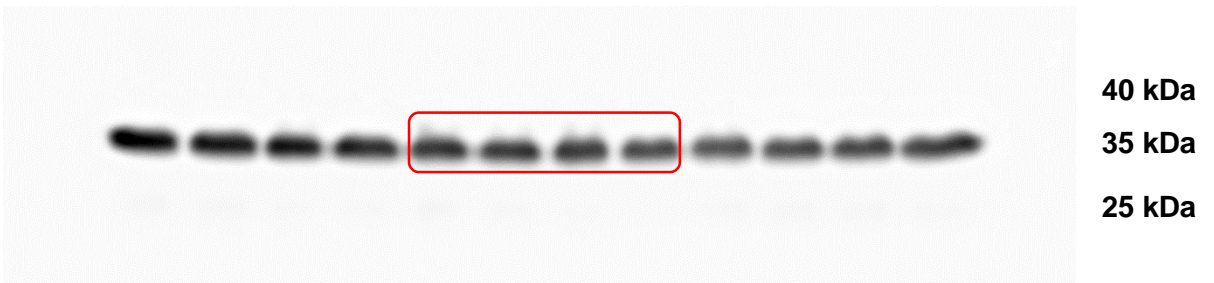



**Full unedited gel for Online Figure I B. LC3**

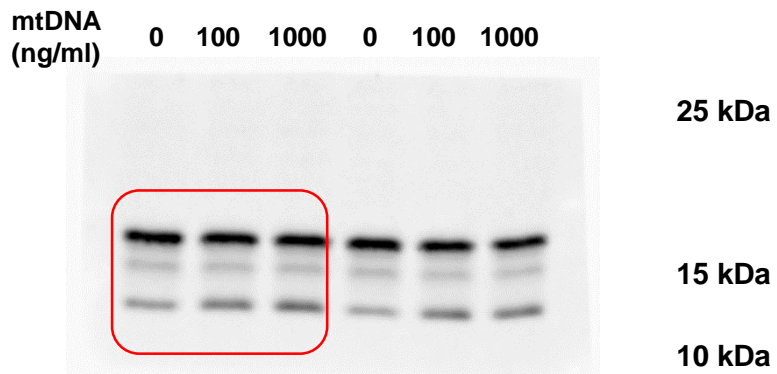

**Full unedited gel for Online Figure I B. ZBP1**  
The order is the same as LC3

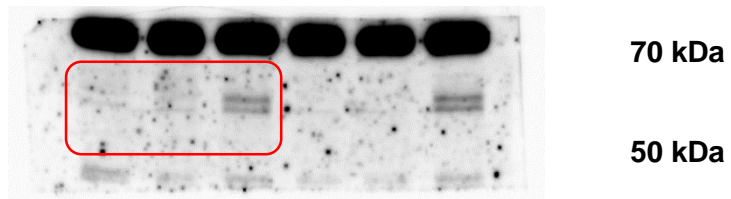

**Full unedited gel for Online Figure I B. RIPK3**  
The order is the same as LC3

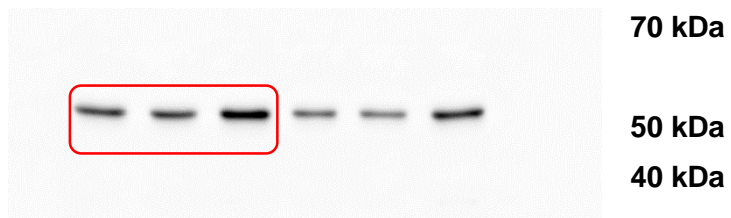

**Full unedited gel for Online Figure I B. pNF- $\kappa$ B (Ser 536)**

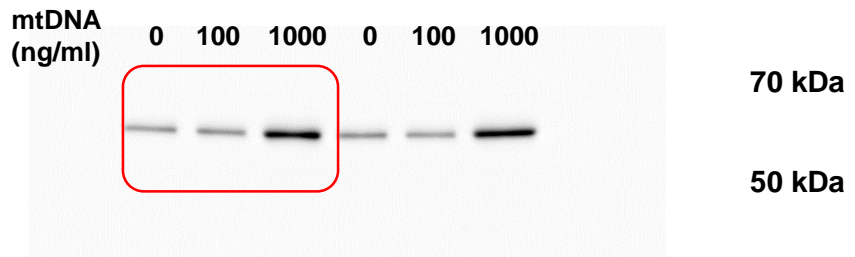

**Full unedited gel for Online Figure I B. NF- $\kappa$ B**  
The order is the same as pNF- $\kappa$ B (Ser 536)

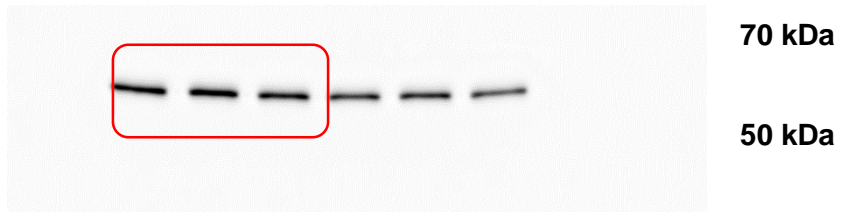

**Full unedited gel for Online Figure I B. NLRP3**  
The order is the same as pNF- $\kappa$ B (Ser 536)

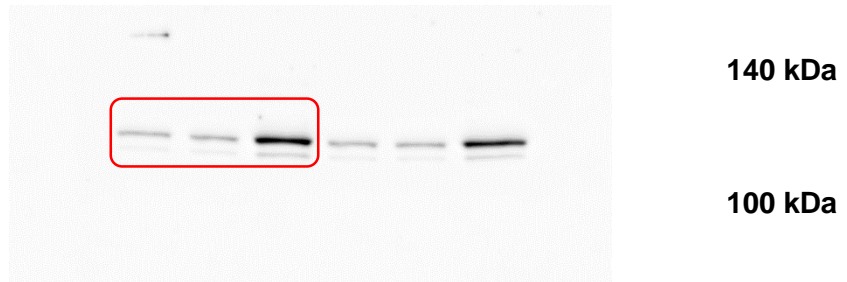

**Full unedited gel for Online Figure I B. GAPDH**  
The order is the same as pNF- $\kappa$ B (Ser 536)

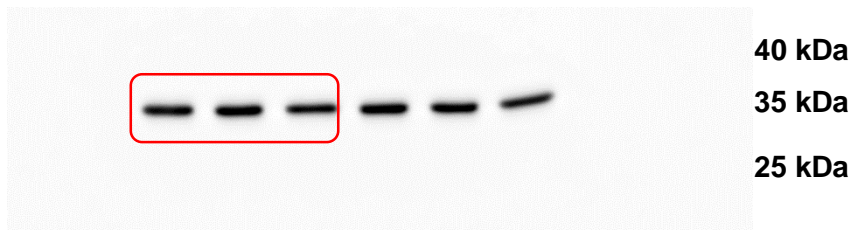

Full unedited gel for Online Figure II B. ZBP1

|         |   |   |   |   |   |   |   |   |   |   |   |   |
|---------|---|---|---|---|---|---|---|---|---|---|---|---|
| mtDNA   | - | - | + | + | - | - | + | + | - | - | + | + |
| Ad ZBP1 | - | + | - | + | - | + | - | + | - | + | - | + |

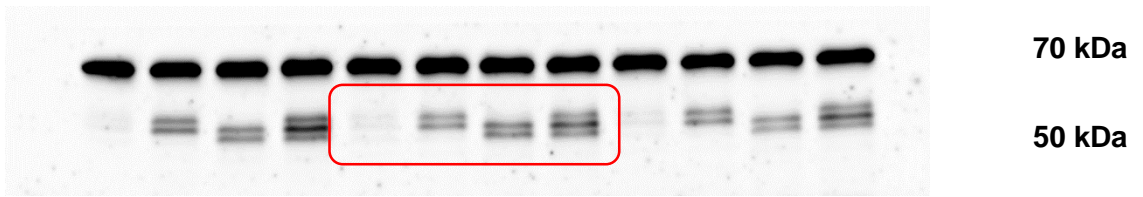

Full unedited gel for Online Figure II B. RIPK3  
The order is the same as ZBP1

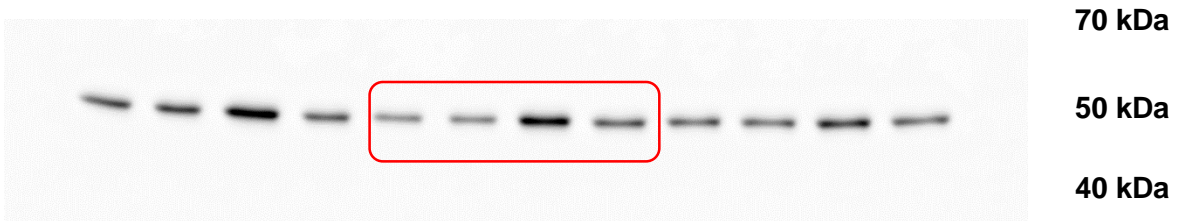

Full unedited gel for Online Figure II B. pNF- $\kappa$ B (Ser 536)  
The order is the same as ZBP1

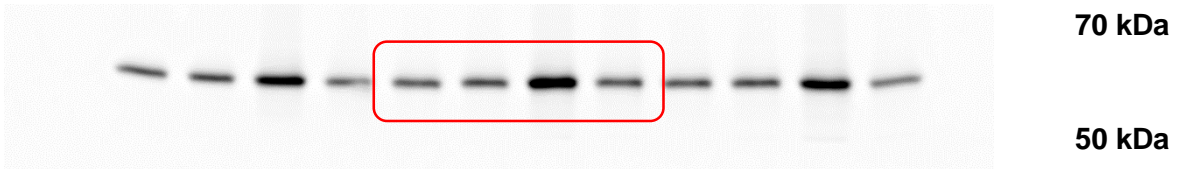

Full unedited gel for Online Figure II B. NF- $\kappa$ B  
The order is the same as pNF- $\kappa$ B (Ser 536)

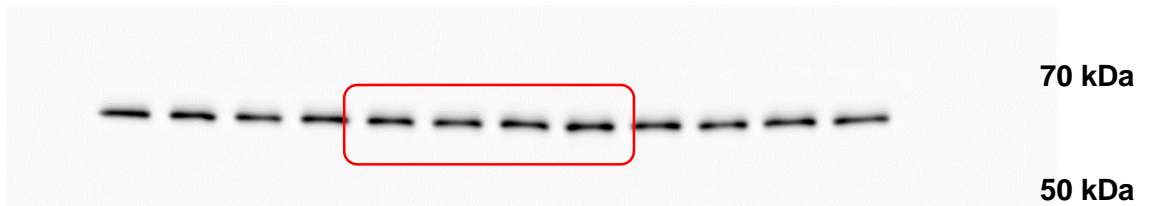

Full unedited gel for Online Figure II B. NLRP3

|         |   |   |   |   |   |   |   |   |   |   |   |   |
|---------|---|---|---|---|---|---|---|---|---|---|---|---|
| mtDNA   | - | - | + | + | - | - | + | + | - | - | + | + |
| Ad ZBP1 | - | + | - | + | - | + | - | + | - | + | - | + |

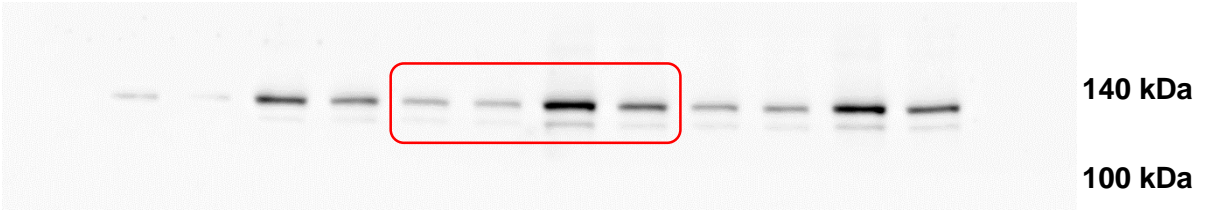

Full unedited gel for Online Figure II B. GAPDH  
The order is the same as NLRP3

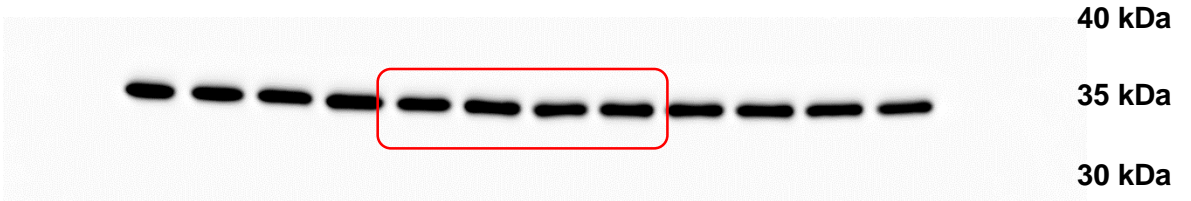

Full unedited gel for Online Figure III B. ZBP1

|         |   |   |   |   |   |   |   |   |   |   |   |   |
|---------|---|---|---|---|---|---|---|---|---|---|---|---|
| mtDNA   | - | - | + | + | - | - | + | + | - | - | + | + |
| ZBP1 KD | - | + | - | + | - | + | - | + | - | + | - | + |

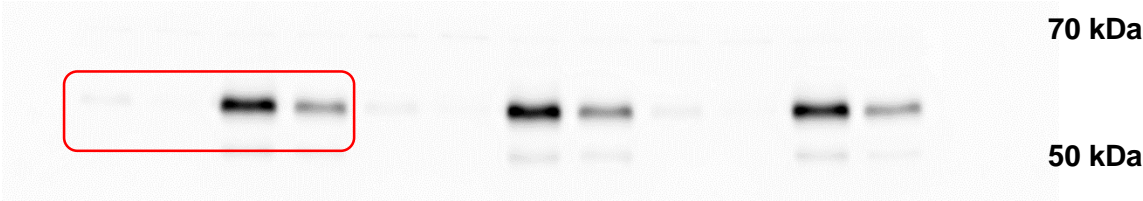

Full unedited gel for Online Figure III B. GAPDH  
The order is the same as ZBP1

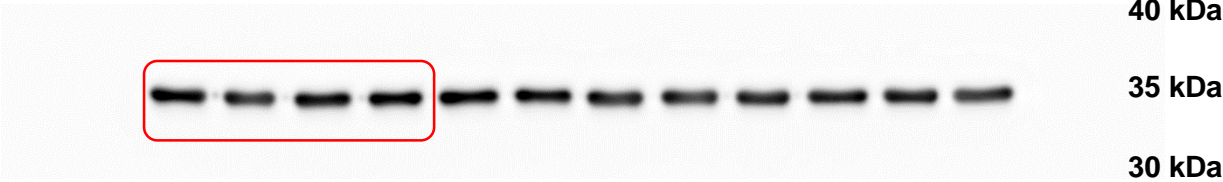

**Full unedited gel for Online Figure IV B. ZBP1**

|             |   |   |   |   |   |   |   |   |   |   |   |   |
|-------------|---|---|---|---|---|---|---|---|---|---|---|---|
| Control-ODN | - | - | + | + | - | - | + | + | - | - | + | + |
| ZBP1 KD     | - | + | - | + | - | + | - | + | - | + | - | + |

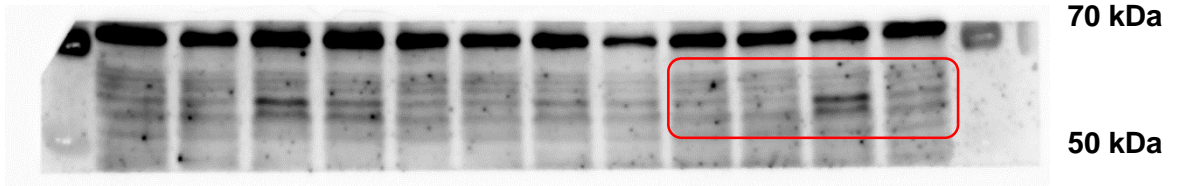

**Full unedited gel for Online Figure IV B. GAPDH**  
The order is the same as ZBP1

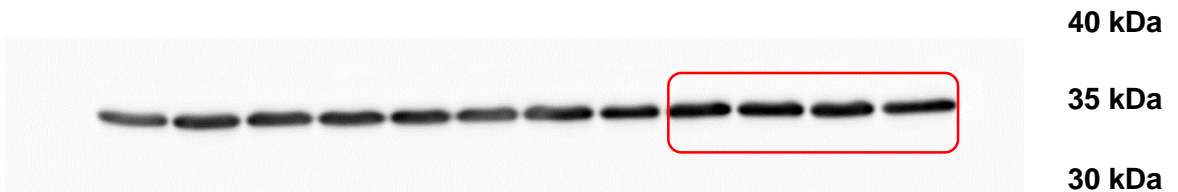

**Full unedited gel for Online Figure IV D. ZBP1**

|             |   |   |   |   |   |   |   |   |   |   |   |   |
|-------------|---|---|---|---|---|---|---|---|---|---|---|---|
| Control-ODN | - | - | + | + | - | - | + | + | - | - | + | + |
| TLR9 KD     | - | + | - | + | - | + | - | + | - | + | - | + |

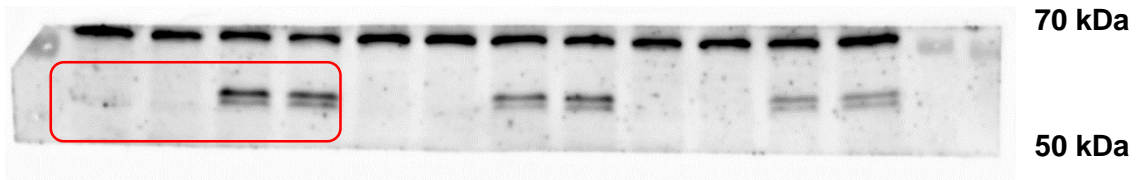

**Full unedited gel for Online Figure IV D. GAPDH**  
The order is the same as ZBP1

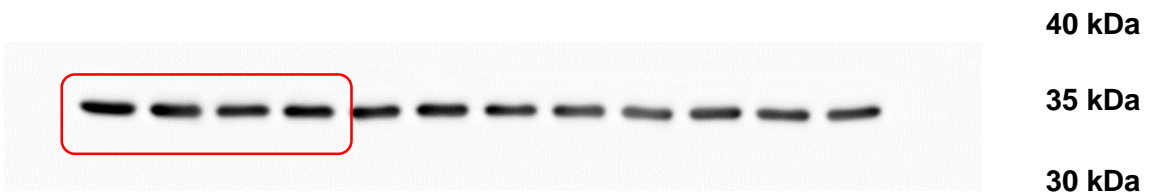



Full unedited gel for Online Figure V A. RIPK3

mtDNA  
TLR9 KD

- - + + - - + + - - + +  
- + - + - + - + - + - +

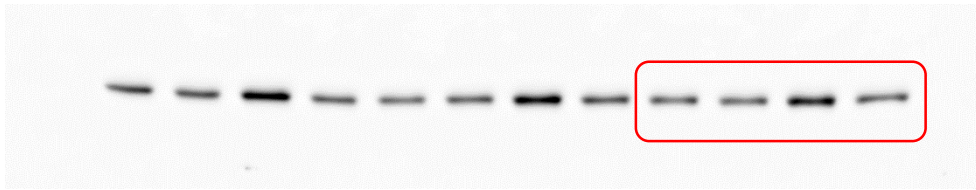

70 kDa  
50 kDa  
40 kDa

Full unedited gel for Online Figure V A. pNF- $\kappa$ B (Ser 536)  
The order is the same as RIPK3

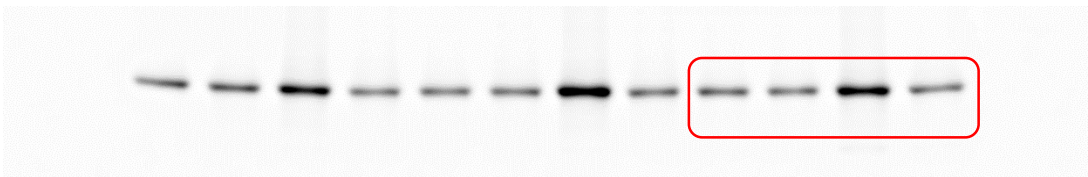

70 kDa  
50 kDa

Full unedited gel for Online Figure V A. NF- $\kappa$ B  
The order is the same as RIPK3

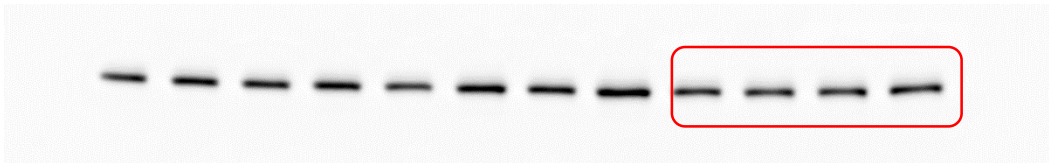

70 kDa  
50 kDa

Full unedited gel for Online Figure V A. NLRP3

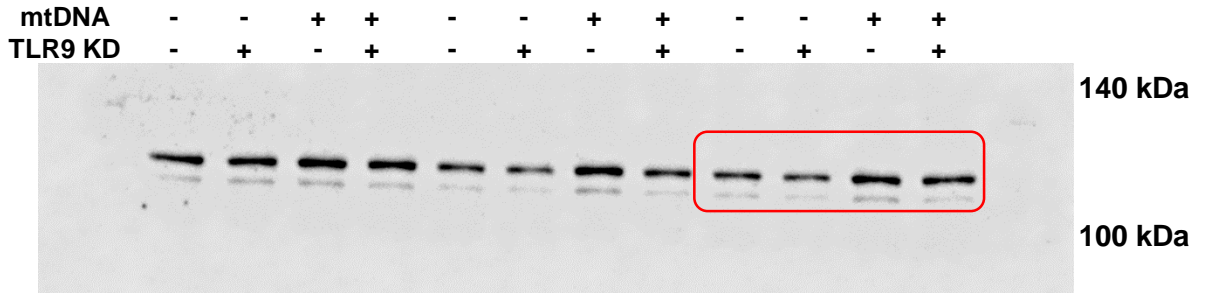

Full unedited gel for Online Figure V A. GAPDH  
The order is the same as NLRP3

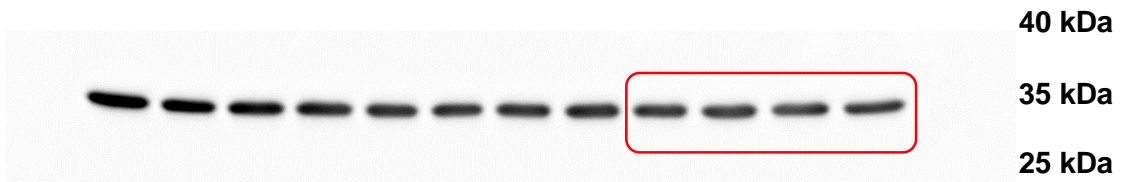

Full unedited gel for Online Figure VII A. pRIPK1

|          |   |   |   |   |   |   |   |   |   |   |   |   |
|----------|---|---|---|---|---|---|---|---|---|---|---|---|
| mtDNA    | - | - | + | + | - | - | + | + | - | - | + | + |
| RIPK1 KD | - | + | - | + | - | + | - | + | - | + | - | + |

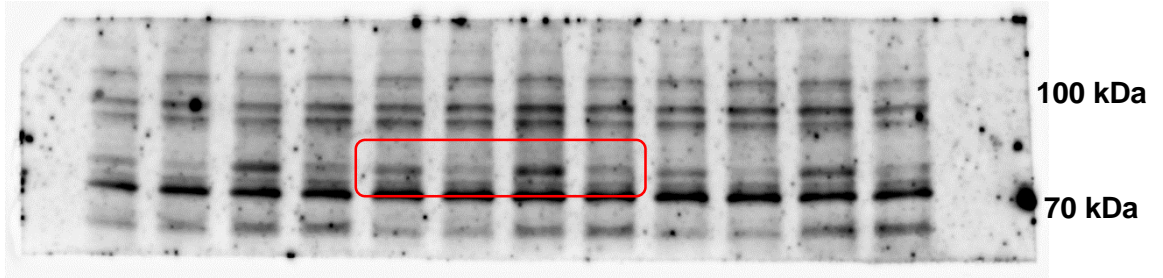

Full unedited gel for Online Figure VII A. RIPK1  
The order is the same as pRIPK1

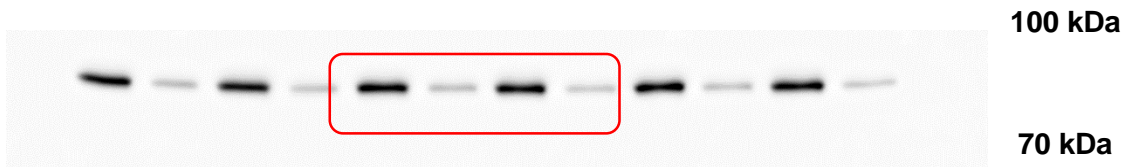

Full unedited gel for Online Figure VII A. ZBP1  
The order is the same as pRIPK1

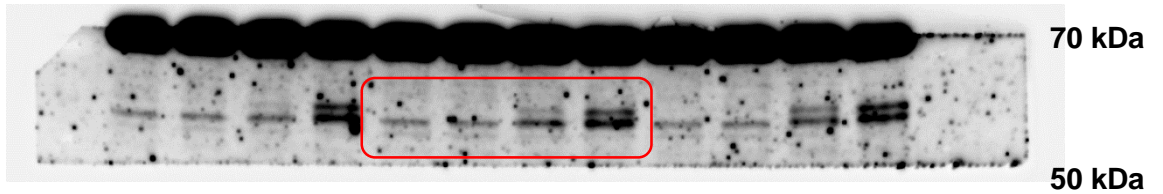

Full unedited gel for Online Figure VII A. RIPK3  
The order is the same as pRIPK1

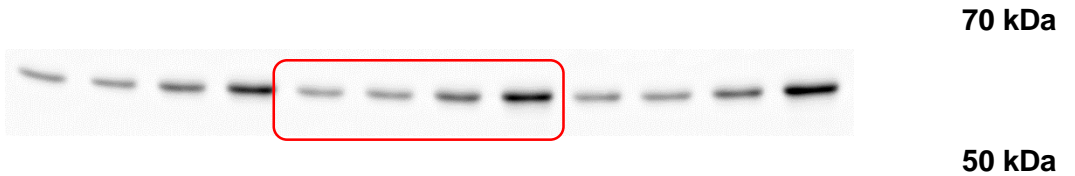

Full unedited gel for Online Figure VII A. pNF- $\kappa$ B (Ser 536)

|          |   |   |   |   |   |   |   |   |   |   |   |   |
|----------|---|---|---|---|---|---|---|---|---|---|---|---|
| mtDNA    | - | - | + | + | - | - | + | + | - | - | + | + |
| RIPK1 KD | - | + | - | + | - | + | - | + | - | + | - | + |

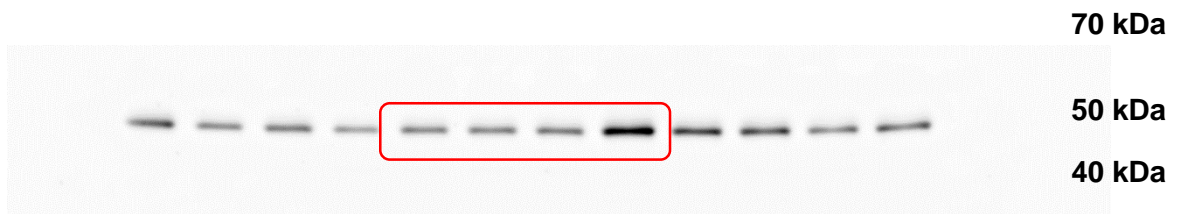

Full unedited gel for Online Figure VII A. NF- $\kappa$ B  
The order is the same as pNF- $\kappa$ B (Ser 536)

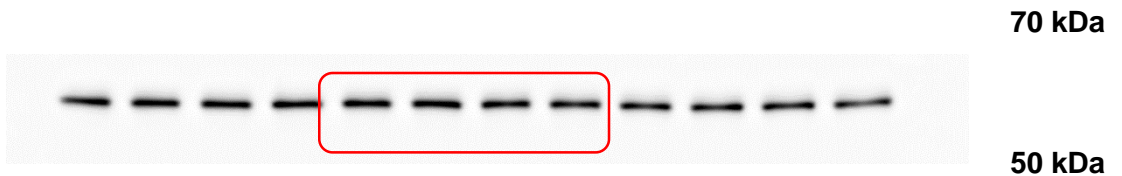

Full unedited gel for Online Figure VII A. NLRP3  
The order is the same as pNF- $\kappa$ B (Ser 536)

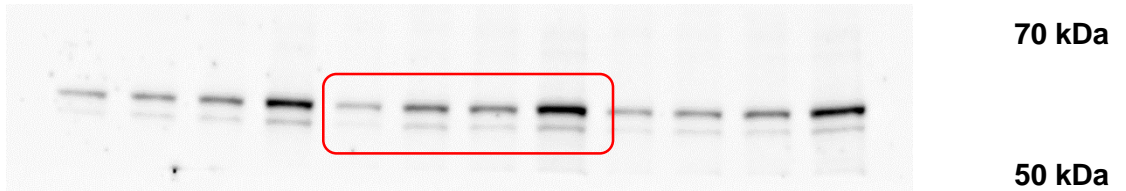

Full unedited gel for Online Figure VII A. GAPDH  
The order is the same as pNF- $\kappa$ B (Ser 536)

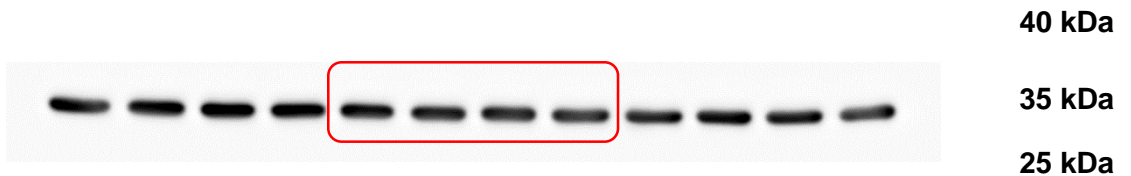

**Full unedited gel for Online Figure VIII A. STING**

mtDNA    -    +    -    +    -    +    -    +    -    +    -    +

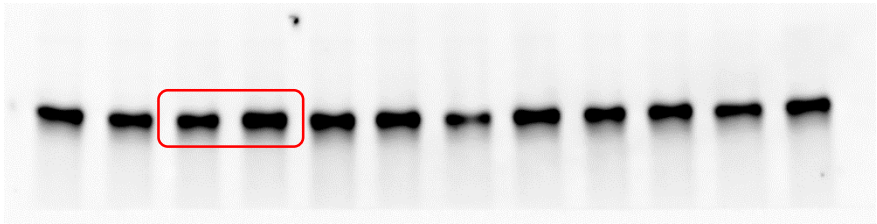

**Full unedited gel for Online Figure VIII A. GAPDH**  
The order is the same as STING

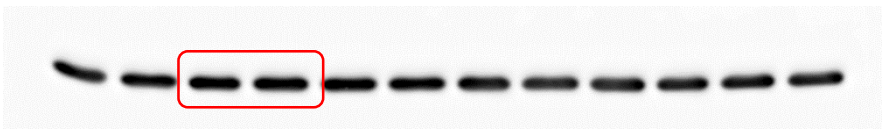

Full unedited gel for Online Figure VIII C. ZBP1

|          |   |   |   |   |   |   |   |   |   |   |   |   |
|----------|---|---|---|---|---|---|---|---|---|---|---|---|
| mtDNA    | - | - | + | + | - | - | + | + | - | - | + | + |
| STING KD | - | + | - | + | - | + | - | + | - | + | - | + |

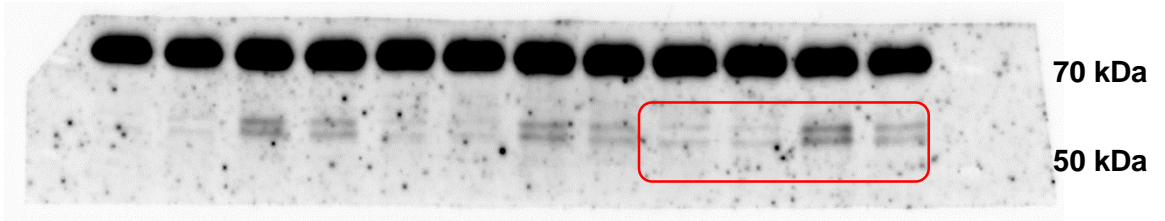

Full unedited gel for Online Figure VIII C. RIPK3

The order is the same as ZBP1

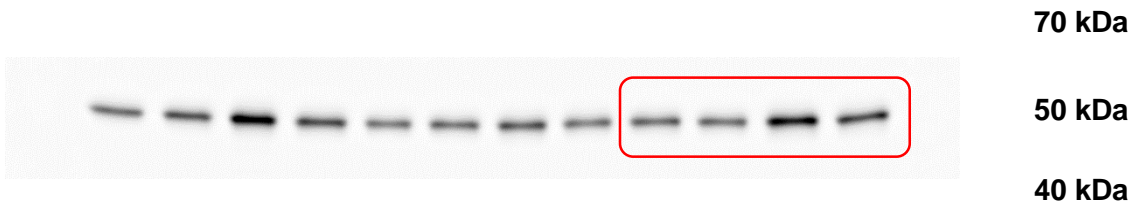

Full unedited gel for Online Figure VIII C. pNF- $\kappa$ B (Ser 536)

The order is the same as ZBP1

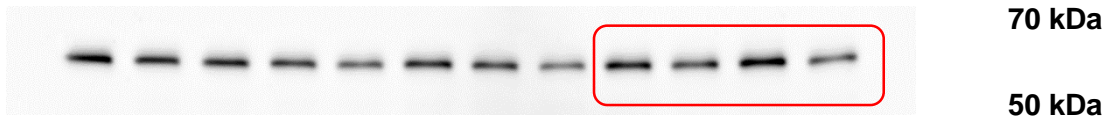

Full unedited gel for Online Figure VIII C. NF- $\kappa$ B

The order is the same as ZBP1

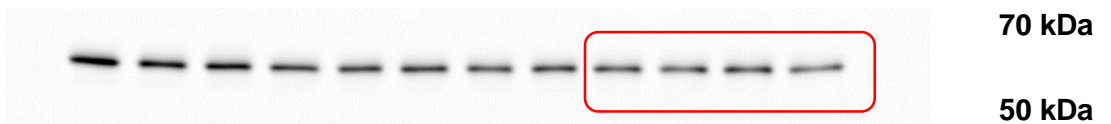

Full unedited gel for Online Figure VIII C. NLRP3

|          |   |   |   |   |   |   |   |   |   |   |   |   |
|----------|---|---|---|---|---|---|---|---|---|---|---|---|
| mtDNA    | - | - | + | + | - | - | + | + | - | - | + | + |
| STING KD | - | + | - | + | - | + | - | + | - | + | - | + |

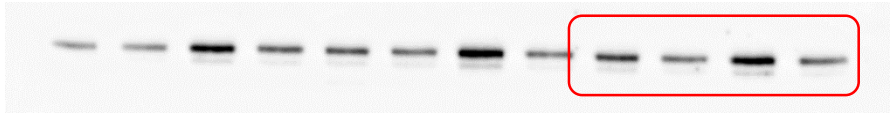

Full unedited gel for Online Figure VIII C. GAPDH  
The order is the same as NLRP3

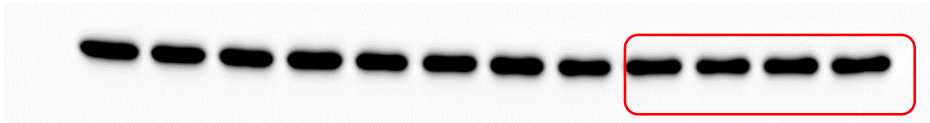



Full unedited gel for Online Figure X A. ZBP1

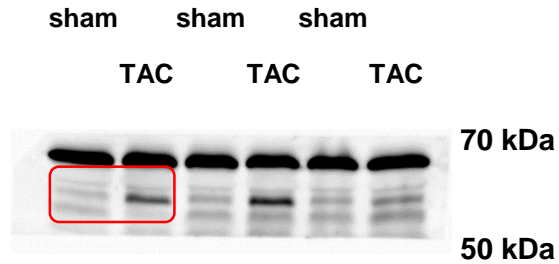

Full unedited gel for Online Figure X A. RIPK3  
The order is the same as ZBP1

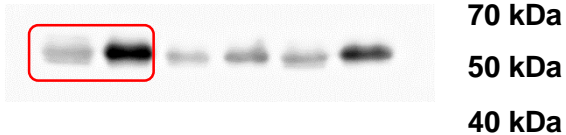

Full unedited gel for Online Figure X A.  
pNF- $\kappa$ B (Ser 536)  
The order is the same as ZBP1

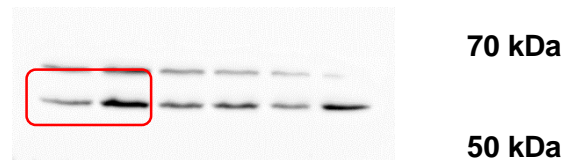

Full unedited gel for Online Figure X A. NF- $\kappa$ B  
The order is the same as ZBP1

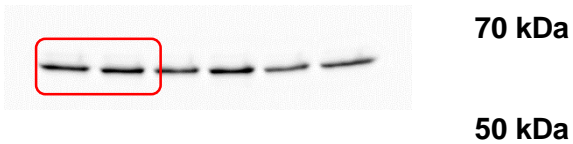

Full unedited gel for Online Figure X A.  
NLRP3  
The order is the same as ZBP1

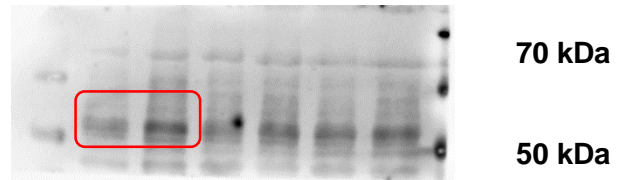

Full unedited gel for Online Figure X A. GAPDH  
The order is the same as ZBP1

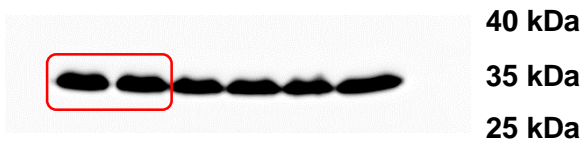

Full unedited gel for Online Figure XIII. ZBP1

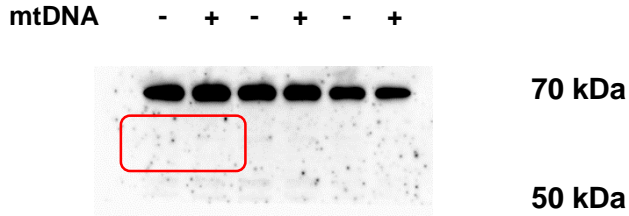

Full unedited gel for Online Figure XIII. RIPK3  
The order is the same as ZBP1

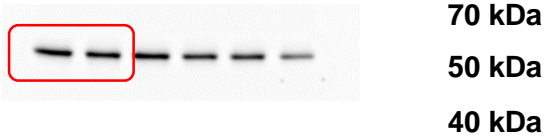

Full unedited gel for Online Figure XIII.  
pNF- $\kappa$ B (Ser 536)  
The order is the same as ZBP1

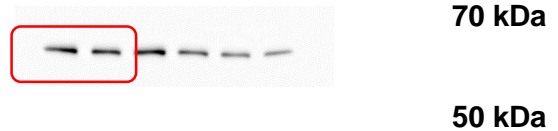

Full unedited gel for Online Figure XIII. NF- $\kappa$ B  
The order is the same as ZBP1

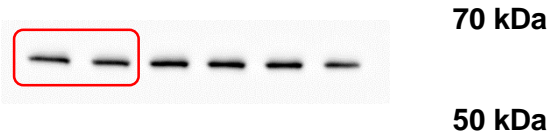

Full unedited gel for Online Figure XIII.  
NLRP3  
The order is the same as ZBP1

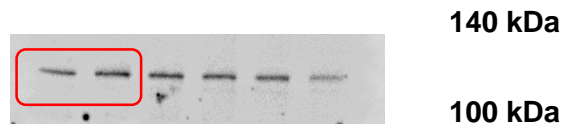

Full unedited gel for Online Figure XIII. GAPDH  
The order is the same as ZBP1

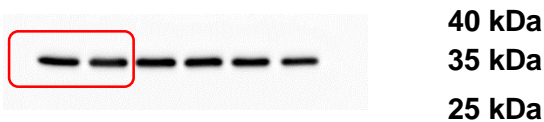

Full unedited gel for Figure XIV B. BAX

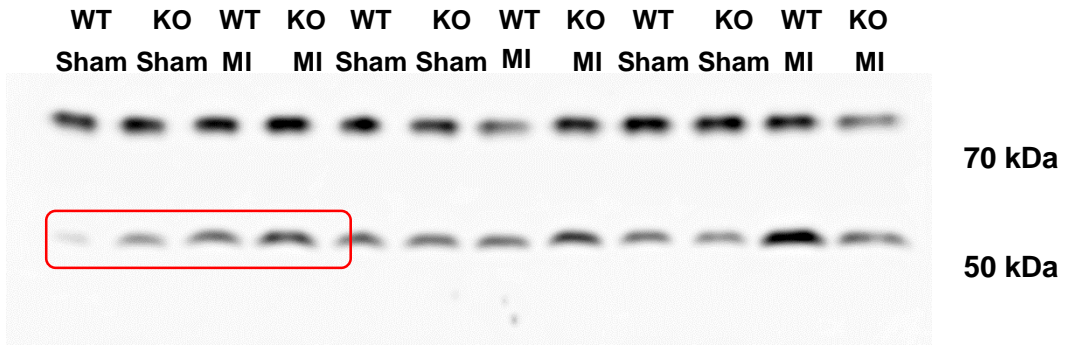

Full unedited gel for Figure XIV B. Bcl2  
The order is the same as BAX

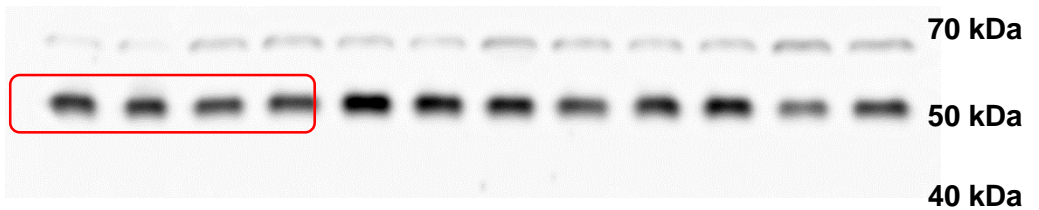

Full unedited gel for Figure XIV B. GAPDH  
The order is the same as BAX

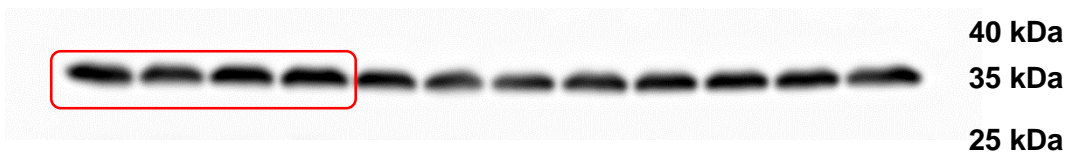

Supplement: res-132-1110-s001.pdf [file res-132-1110-s001.pdf]
