# Supplementary material for: ZBP1 Protects Against mtDNA-Induced Myocardial Inflammation in Failing Hearts
Source: PubMed Central journal article supplement — Circ Res. 2023 Mar 28;132(9):1110–26. doi: 10.1161/CIRCRESAHA.122.322227 (PMC10144299; doi:10.1161/circresaha.122.322227), 2023-03-28
Supplement: res-132-1110-s003.pdf [file res-132-1110-s003.pdf]

# **Supplemental Material**

## 1 Detailed methods

### 3 Primary culture of neonatal rat ventricular myocytes and RAW264.7 macrophages

4 Primary cultures of neonatal rat ventricular myocytes (NRVMs) were prepared from 1-day-old  
5 Sprague-Dawley rats (Kyudo Inc, Japan). A cardiac myocyte-rich fraction was obtained by  
6 centrifugation through a discontinuous Percoll gradient as described previously<sup>27</sup>. RAW264.7  
7 macrophages were purchased from RIKEN BRC.

### 9 Plasmids and viral vector construction

10 The adenoviral vectors used to overexpress ZBP1-mcherry-flag and ZBP1 in our study were  
11 constructed and packaged by VectorBuilder. The vector ID is VB210915-1271fwa and  
12 VB191211-3603xtk, respectively, which can be used to retrieve detailed information about the  
13 vector on vectorbuilder.com.

### 15 mtDNA and CpG-ODN transfection

16 mtDNA was isolated from Sprague-Dawley rat liver by using mtDNA extractor CT kit (WAKO,  
17 291-55301). To assess the purity of mtDNA, the copy number of DNA encoding Cox1 and At3  
18 were measured by quantitative real-time PCR. CpG-ODN (ttrl-dsl01), FITC-labeled CpG-ODN  
19 (ttrl-1668f) and negative control for CpG-ODN (ttrl-1668c) were purchased from Invivogen. We  
20 used Lipofectamine 2000 (Thermo Fisher Scientific, 11668027) as a transfection reagent. The  
21 forward (F) and reverse (R) primer sequences were as follows: Cox1 (rat), F 5' -  
22 CTGAGCGGGAATAGTGGGTA-, 3' , R 5' -GTCAGTTTCCAAAGCCTCCA-3' ; At3  
23 (rat), F 5' -GCCGGAATCCTACTTTCA-, R 5' -TCCGTGACAGATAGCACAGC-3' .  
24 The same procedures were conducted with Sprague-Dawley rat hearts to investigate whether the  
25 same response was induced regardless of tissues.

### 27 siRNA and transfection

28 Silencing of ZBP1, RIPK3, NF-κB, TLR9, RIPK1, and STING gene expressions in primary  
29 neonatal rat ventricular myocytes (NRVMs) were achieved by the small interfering RNA  
30 (siRNA) technique. The sequences of the siRNA duplexes were selected from the coding regions  
31 of the target mRNAs. Silencer select siRNA specific to decrease the expression of each gene  
32 mRNA and negative control (#4390843) were purchased from Thermo Fisher Scientific. The  
33 sense strand of siRNA used were as follows: ZBP1, GCAACGAGAUGAACCUCGAtt; RIPK3,  
34 GGAACGCACCAAACCCAAUtt; NF-κB, ACCCAGGAGUGUUCACAGAtt; TLR9,  
35 GGACCUGUACCAUUCGAAAtt; RIPK1, GCACUACUUACAUGACGAATT; STING,  
36 CCAAGAAUCCGAAGAGGGATT. Transfection of cultured cardiomyocytes was carried out  
37 by Lipofectamine RNAiMAX (Thermo Fisher Scientific) according to the proposed protocol.

### 39 Immunoblot analyses

40 Cardiomyocyte lysates and heart homogenates were prepared in RIPA lysis buffer containing  
41 Tris-HCl, NaCl, NP-40, sodium deoxycholate, and SDS. For immunoblot analyses, we used  
42 monoclonal antibodies against ZBP1 (#AG-20B-0010-C100, Adipogen Life Science), RIPK3  
43 (#15828, Cell Signaling Technology), RIPK1 (#3493, Cell Signaling Technology),  
44 phosphorylated-RIPK1 (#53286, Cell Signaling Technology), STING (#50494, Cell Signaling  
45 Technology), NF-κB (#8242, Cell Signaling Technology), phosphorylated NF-κB (Ser536)  
46 (#3033, Cell Signaling Technology), NLRP3 (#15101, Cell Signaling Technology), Bcl-2  
47 (#3498, Cell Signaling Technology), TBK1 (#3013, Cell Signaling Technology), phosphorylated

1 TBK1 (Ser172) (#5483, Cell Signaling Technology), and GAPDH (sc32233, Santa Cruz  
2 Biotechnology), and polyclonal antibodies against LC3 (#4108, Cell Signaling Technology),  
3 COX4 (#4844, Cell Signaling Technology), and BAX (#2772, Cell Signaling Technology).  
4

### 5 **Quantitative real-time PCR**

6 Total RNA extraction and quantitative PCR (qPCR) were performed as described previously,  
7 with some modifications. Briefly, total RNA was extracted using an RNeasy Mini Kit (Qiagen),  
8 RNA was converted to cDNA using ReverTra Ace qPCR RT Kit (TOYOBO), and the reactions  
9 were run in an Applied Biosystems QuantStudio3 for the THUNDERBIRD SYBR qPCR Mix.  
10 For measurement of mtDNA in cytosol, heart homogenates were prepared in 100 mM Tricine-  
11 NaOH solution, pH 7.4, containing 0.25 M sucrose, 1 mM EDTA and protease inhibitor, then  
12 were centrifuged at 700g for 10 min at 4 °C<sup>28</sup>. Protein concentration and volume of the  
13 supernatant were normalized, followed by centrifugation at 100,000g for 60 min at 4 °C for the  
14 production of a supernatant corresponding to the cytosolic fraction. DNA was isolated from 200  
15 µl of the cytosolic fraction as described above by using DNeasy Blood & Tissue Kit (Qiagen).  
16 The copy number of DNA encoding *Dloop*, *Tert*, and *B2m* were measured by quantitative real-  
17 time PCR with same volume of the DNA solution. Cytosolic fraction of NRVMs was prepared as  
18 the same procedure described above.

19 The forward (F) and reverse (R) primer sequences were as follows: *Rps18* (mouse), F 5' -  
20 TTCTGGCCAACGGTCTAGACAAC-, 3' , R 5' -CCAGTGGTCTTGGTGTGCTGA-3' ;  
21 *Rps18* (rat), F 5' -AAGTTTCAGCACATCCTGCGAGTA -, R 5' -  
22 TTGGTGAGGTCAATGTCTGCTTTC-3' ; *Zbp1* (mouse), F 5' -  
23 AAGAGTCCCCTGCGATTATTTG-3', R 5'-TCTGGATGGCGTTTGAATTGG-3'; *Zbp1* (rat),  
24 F 5'-AGATCCTGCAGGTGTTGAGTGATG-3'; R 5' GCCCTCTTCTTCAGGCGGTA-3';  
25 *Il1b* (mouse), F 5'-TCCAGGATGAGGACATGAGCAC3', R 5'-  
26 GAACGTCACACACCAGCAGGTTA-3'; *Il1b* (rat), F 5' -  
27 CTACCTATGTCTTGCCCGTGGAG-, R 5'-GCGAACATCACACACTAGCAGGTC-3'; *Il6*  
28 (mouse), F 5'-CCACTTACAAGTCGGAGGCTTA-3', R 5'-  
29 GCAAGTGCATCATCGTTGTTTCATAC-3'; *Il6* (rat), F 5' -  
30 ATTGTATGAACAGCGATGATGCAC-, R 5' -CCAGGTAGAAACGGAACTCCAGA-; *Tlr9*  
31 (rat), F 5'-TGCTGCCCAGTTTGTGTCAGAG3', R 5'-ATGAGGCTTCAGTTCACAGGGTAG-3';  
32 *Dloop* (mouse), F 5'-TCCTCCGTGAAACCAACAA-, R 5'-AGCGAGAAGAGGGGCATT-3';  
33 *Tert* (mouse), F 5'-CTAGCTCATGTGTCAAGACCCTCTT-3', R 5'-  
34 GCCAGCACGTTTCTCTCGTT-3'; *B2m* (mouse), F 5'-ATGGGAAGCCGAACATACTG-3',  
35 R 5'-CAGTCTCAGTGGG GGTGAAT-3'.  
36

### 37 **Measurement of cytokine secretion**

38 Using post-MI heart, the cytokine secretion of IL-1 $\beta$  and IL-6 were measured with Quantikine  
39 ELISA kit in accordance with the supplier's protocol (R & D systems).  
40

### 41 **Animal models**

42 ZBP1 knockout mice were created by professor Shizuo Akira from Osaka University<sup>29</sup> and  
43 kindly gifted by National Institutes of Biomedical Innovation, Health and Nutrition (NIBIOHN,  
44 Japan). This strain was backcrossed with C57BL/6J mice in our laboratory. Homozygous KO  
45 mice and WT mice were used. We created MI in 12- to 13-week-old, male KO mice (KO + MI)  
46 and WT littermates (WT + MI) by ligating the left coronary artery. Sham operation without  
47 coronary artery ligation was also performed in KO (KO + sham) and WT (WT + sham) mice.

1 Recent studies showed that there were gender differences in inflammatory responses<sup>30</sup>. We used  
2 male mice and excluded female mice to exclude potential effects of gender differences on the  
3 results. All animals were randomly assigned to different experimental groups. We used  
4 randomisation within blocks based on date of birth. To minimise potential confounders such as  
5 cage location, mice were housed in the same rack. AI was aware of the group allocation during  
6 allocation, at the conduct of the experiment, the outcome assessment, and the data analysis. Data  
7 acquisition and analysis were performed by investigators who were blinded to the group  
8 assignment. Immunoblot analysis was conducted by using non-infarct area of the hearts at 3 days  
9 after coronary artery ligation. After 3 and 28 days, echocardiography was performed and then the  
10 heart was extracted for histological analysis. Heart weight and left ventricular weight were  
11 assessed at 28 days after surgery. All of the animals were included except for those died after the  
12 surgery. All procedures involving animals and animal care protocols were approved by the  
13 Committee on Ethics of Animal Experiments of the Kyushu University Graduate School of  
14 Medicine and Pharmaceutical Sciences (A29-390), and were performed in accordance with the  
15 Guideline for Animal Experiments of Kyushu University and the Guideline for the Care and Use  
16 of Laboratory Animals published by the US National Institutes of Health (revised in 2011) and  
17 comply with the ARRIVE guideline. The ARRIVE checklist is provided as supplemental data.  
18

### 19 **Pressure overload-induced heart failure model**

20 To assess the expression of ZBP1 and its downstream signaling, pressure overload-induced heart  
21 failure model was used. The 10- to 12-week-old male C57BL/6J mice were subjected to TAC  
22 surgery. Sham-operated animals underwent the same operation without aortic constriction. The  
23 TAC or sham-operated mice were sacrificed at 4 weeks.  
24

### 25 **Echocardiography**

26 Under light anesthesia with 1-2% isoflurane, two-dimensional targeted M-mode images were  
27 obtained from the short axis view at the papillary muscle level using a Vevo 2100  
28 ultrasonography system (Visual Sonics, Toronto, Canada) as previously described<sup>31</sup>. We  
29 assessed left ventricular diastolic/systolic diameter, left ventricular ejection fraction, and  
30 fractional shortening. Fractional shortening is calculated from: %FS= [(diastolic LV diameter-  
31 systolic LV diameter)/diastolic LV diameter] × 100].  
32

### 33 **TUNEL staining**

34 TUNEL staining was conducted as described<sup>32</sup>. Deparaffinized sections were incubated with  
35 proteinase K and DNA fragments were labeled with fluorescein-conjugated dUTP using in situ  
36 Apoptosis Detection kit (MK500, Takara). Nuclear density was determined by manual counting  
37 of DAPI-stained nuclei in 10 fields for each animal using a 40x objective.  
38

### 39 **Cell viability assay**

40 Cell viability was assessed using Cell Titer Blue assays (Promega, Madison, WI) in accordance  
41 with the supplier's protocol.  
42

### 43 **Histological analyses**

44 The LV accompanied by the septum was cut into base and apex portions, fixed with 10%  
45 formalin and submitted for Masson's trichrome staining. Collagen volume was determined by  
46 quantitative morphometry of tissue sections from the mid-LV stained with Masson's trichrome as  
47 described previously<sup>33</sup>. To measure infarct size 28 days after MI, the heart was excised and five-

1 micron sections were cut and stained with Picro-Sirius Red. Infarct size (as a percentage) was  
2 calculated as total infarct circumference divided by total cardiac circumference.

### 3 4 **Immunohistochemistry**

5 Heart sections fixed with 10% formalin were embedded in paraffin. After deparaffinization,  
6 endogenous peroxidase was blocked by incubation with 0.3% H<sub>2</sub>O<sub>2</sub> in methanol for 5 minutes.  
7 For antigen retrieval, sections were boiled for 20 minutes in citrate buffer (pH=6.0). After  
8 blocking with 3% skim milk, sections were incubated overnight at 4°C with the following  
9 antibodies: anti-mouse macrophage antibody (Mac3; BD Pharmingen, #550292), anti-mouse  
10 ZBP1 antibody (#AG-20B-0010-C100, Adipogen Life Science), or anti-rabbit RIPK3 antibody  
11 (#15828, Cell Signaling Technology), followed by incubation with biotin-conjugated secondary  
12 antibodies. The mouse isotype control (#5415, Cell Signaling Technology) or rabbit isotype  
13 control (#3900, Cell Signaling Technology) were used as a negative control. Then, the sections  
14 were washed and treated with avidin-peroxidase. The sections were stained using the DAB  
15 substrate kit (Wako Pure Chemical Industries, Osaka, Japan), and nuclei were counterstained  
16 with hematoxylin. Multiple observers who were blinded to the experiment protocol performed  
17 the quantitative analysis. All images were captured with a microscope (BZ-X800, Keyence).

### 18 19 **Immunofluorescence**

20 Cardiomyocytes were infected with adenovirus harboring mcherry-tagged ZBP1. FITC-labeled  
21 CpG-ODN were transfected 24 hours after infection. After 24 hours, nuclei were stained with  
22 Hoechst 33342 (Invitrogen), and cells were observed with a confocal microscope (Nikon). To  
23 assess the effects of ZBP1 on the interaction between TLR9 and CpG-ODN, we transfected  
24 FITC-labeled CpG-ODN after transfection of ZBP1 siRNA (See “Detailed methods” in Online  
25 material). Cells were fixed in 4% paraformaldehyde in PBS for 20 min at room temperature  
26 followed by permeabilization in 0.1% Triton X-100 for 15 min. After blocking in 1% BSA  
27 (A8806, Sigma), cells were incubated with anti-TLR9 (# PA520203, Invitrogen) primary  
28 antibody for 1 hour at room temperature, followed by incubation for 60 min at room temperature  
29 in secondary antibodies (Donkey Anti-Rabbit IgG H&L Alexa Fluor® 647 preadsorbed, #  
30 ab150063, Abcam). The rabbit isotype control (#3900, Cell Signaling Technology) and FITC not  
31 labeled CpG-ODN were used as a negative control for TLR9 and FITC-labeled CpG-ODN,  
32 respectively. Nuclei were stained with Hoechst 33342 (Invitrogen), and cells were observed with  
33 a confocal microscope (Nikon).

### 34 35 **Statistical analysis**

36 All values are expressed as mean ± SEM. Normal distribution was confirmed by Shapiro-Wilk  
37 test. Statistical analyses were described in each Figure Legend. A two-way ANOVA followed by  
38 Tukey post hoc multiple comparisons test was used when there were 2 levels of grouping, and  
39 the normality was not violated. If violated, Wilcoxon rank sum test with or without Bonferroni  
40 correction was used. P < 0.05 was considered to be statistically significant. All analyses were  
41 performed with the SAS statistical package (version 9.4, SAS Institute, Cary, North Carolina).  
42 The authors had full access to and take full responsibility for the integrity of the data.

1  
2  
3  
4  
5  
6  
7  
8  
9  
10  
11  
12  
13

# Supplemental Figures

1

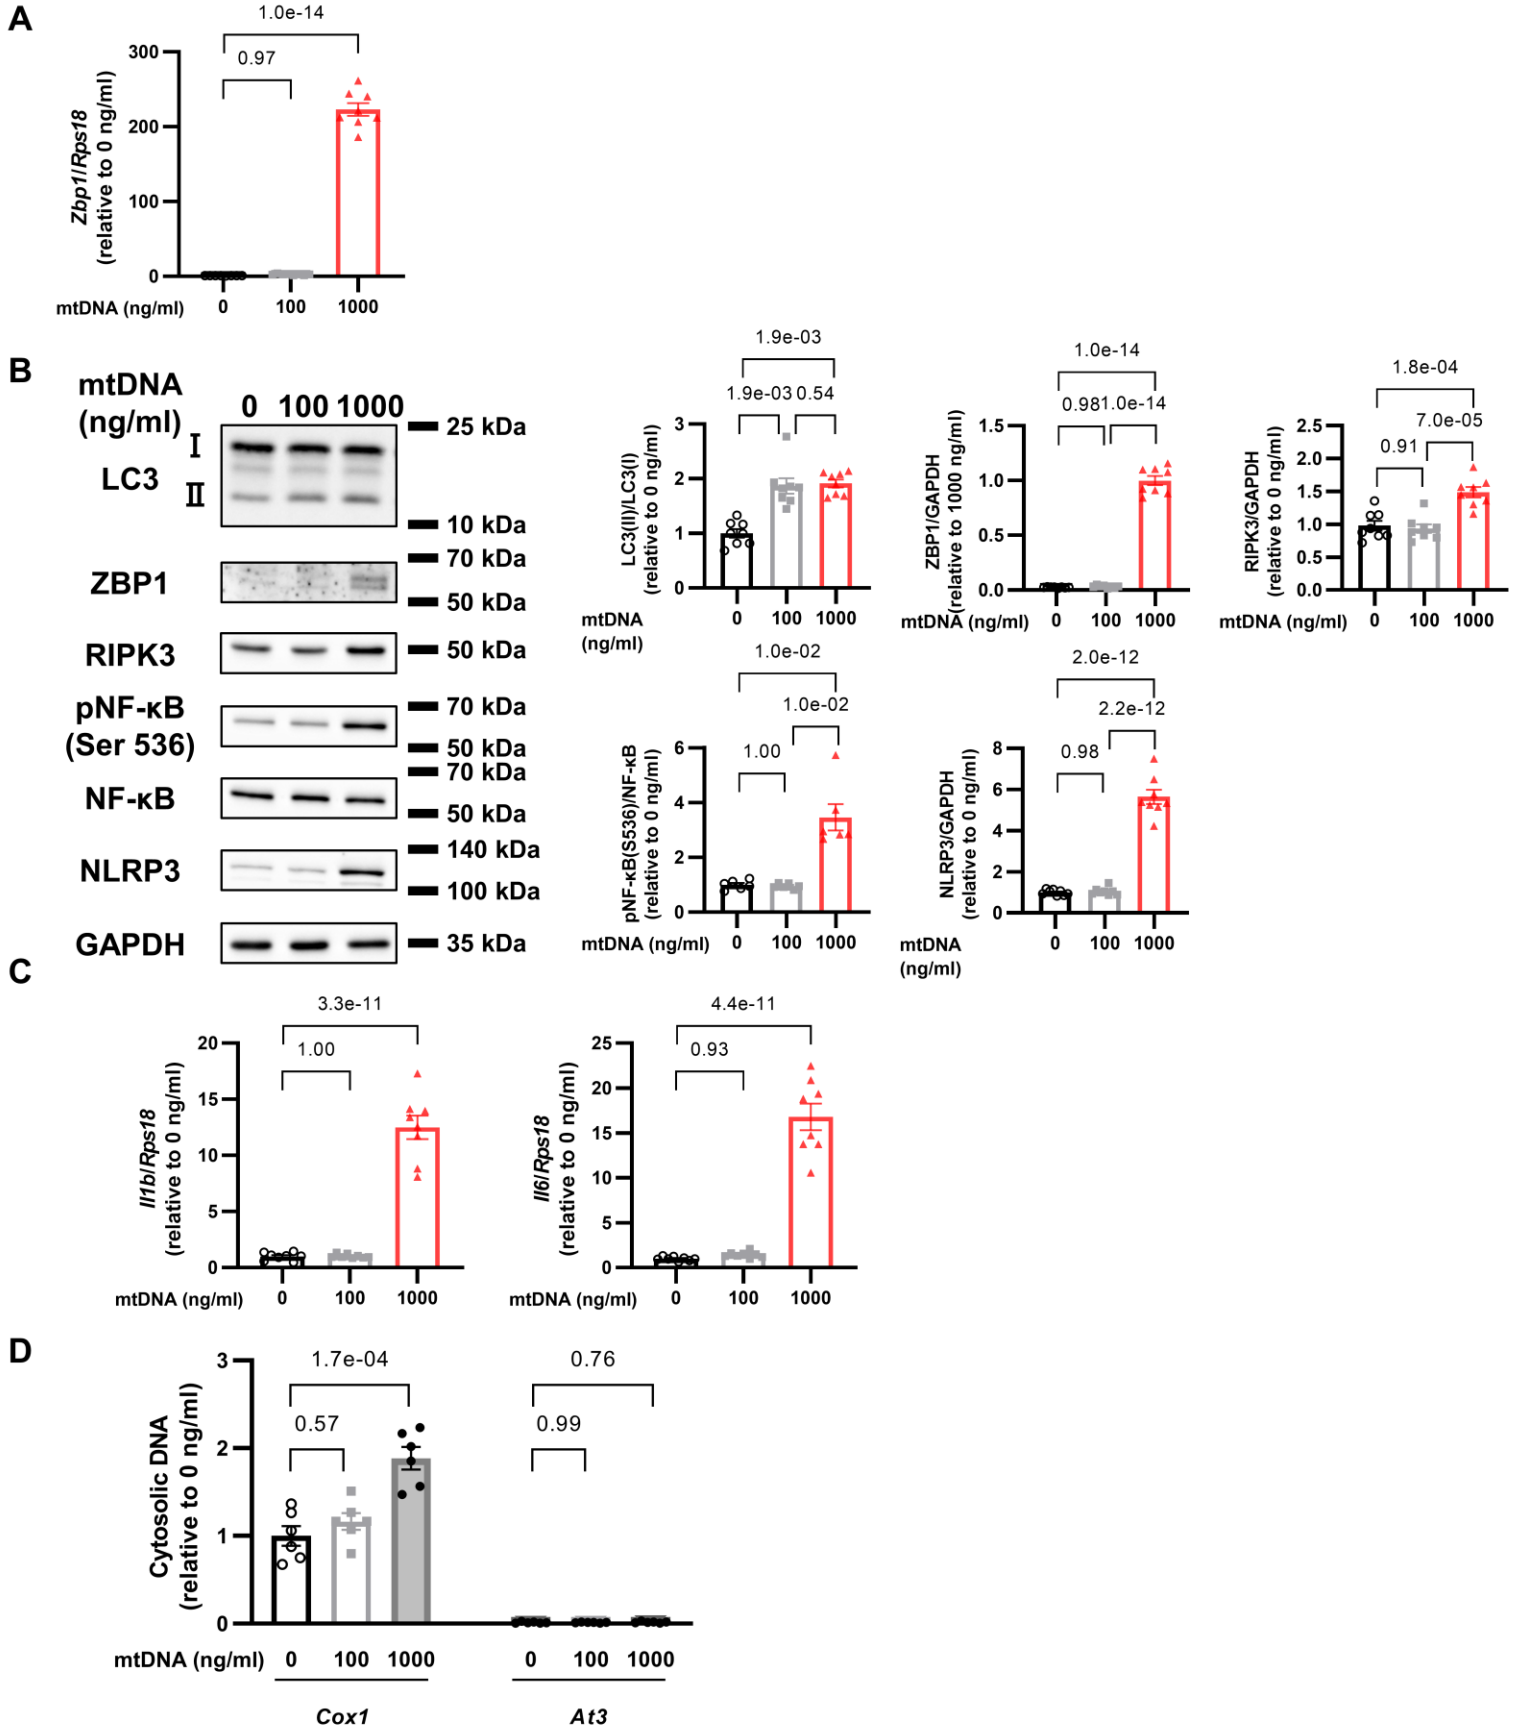

3

1  
2  
3  
4 **Figure S1. mtDNA from rat hearts increases ZBP1 and activates inflammatory signaling in**  
5 **cardiomyocytes.** (A) *Zbp1* levels in NRVMs treated with 100 or 1000 ng/ml of mtDNA  
6 extracted from rat hearts (n = 8). The experiment was conducted 2 times. (B) Representative  
7 immunoblots in cultured neonatal rat ventricular myocytes (NRVMs) treated with 100 or 1000  
8 ng/ml of mtDNA extracted from rat hearts. n = 8 except for NF- $\kappa$ B (n = 6). The experiment was  
9 conducted 3 times except for NF- $\kappa$ B (2 times). (C) *Illb* and *Iil6* mRNA levels in NRVMs treated  
10 with 100 or 1000 ng/ml of mtDNA extracted from rat hearts (n = 8). The experiment was  
11 conducted 2 times. (D) Cytosolic DNA levels in NRVMs stimulated with 100 or 1000 ng/ml  
12 mtDNA was quantified by real-time PCR (n = 6). The experiment was conducted 2 times. Error  
13 bars denote standard errors. Data were analyzed using the Wilcoxon rank sum test (B LC3 and  
14 NF- $\kappa$ B; adjust = 3), and two-way ANOVA followed by Tukey multiple comparisons test (A, B  
15 except for LC3 and NF- $\kappa$ B, C and D).



A

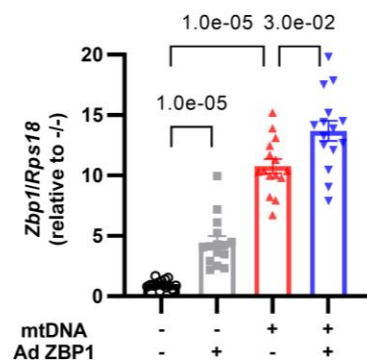

B

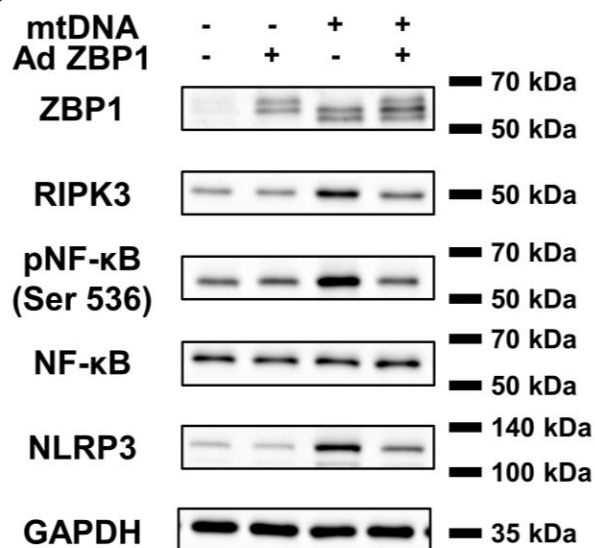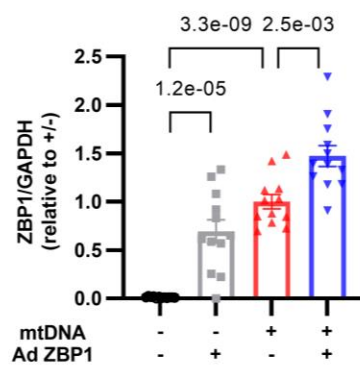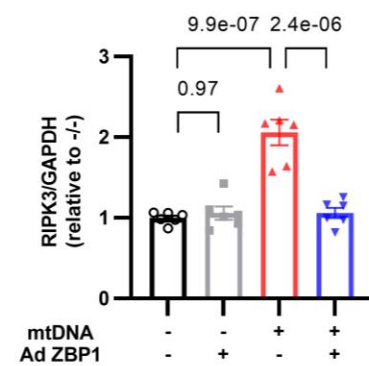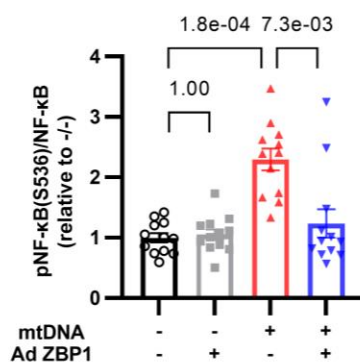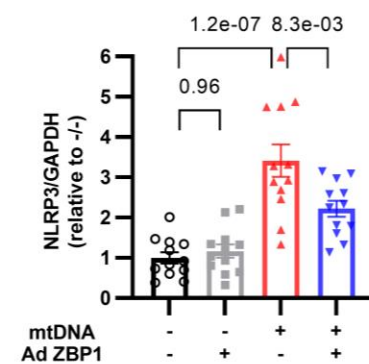

C

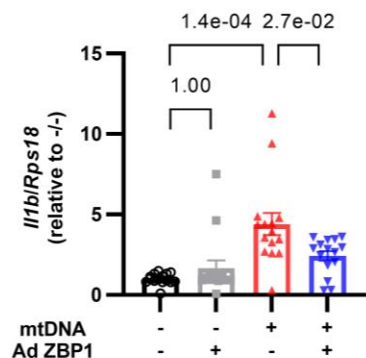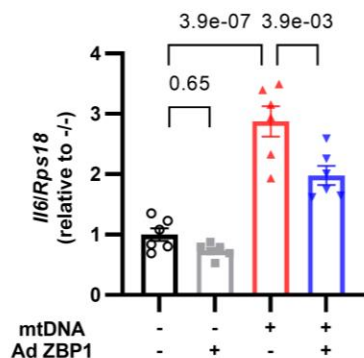

**Figure S2. ZBP1 overexpression attenuates inflammatory responses in cardiomyocyte treated with mtDNA.**

(A) mRNA levels of ZBP1 in NRVMs treated with or without adenovirus harboring ZBP1 (1 moi) in the presence or absence of mtDNA (1000 ng/ml) for 24 hours (n = 15). The experiment was conducted 5 times. (B) Representative immunoblots of ZBP1 (n = 12, number of experiments = 4), RIPK3 (n = 6, number of experiments = 2), phosphorylated NF- $\kappa$ B (Ser 536), NF- $\kappa$ B (n = 12, number of experiments = 4), NLRP3 (n = 12, number of experiments = 4), and GAPDH in NRVMs treated with or without transfection of adenovirus harboring ZBP1 (1 moi) in the presence or absence of mtDNA (1000 ng/ml) for 24 hours. (C) mRNA levels of *Il1b* (n = 15, number of experiments = 5) and *Il6* (n = 6, number of experiments = 2) in NRVMs treated with or without adenovirus harboring ZBP1 (1 moi) in the presence or absence of mtDNA (1000 ng/ml) for 24 hours. Error bars denote standard errors. Data were analyzed using the Wilcoxon rank sum test (A, B except for NF- $\kappa$ B, and C *Il1b*; adjust = 3), and two-way ANOVA followed by Tukey multiple comparisons test (B except for NF- $\kappa$ B and C *Il6*).

A

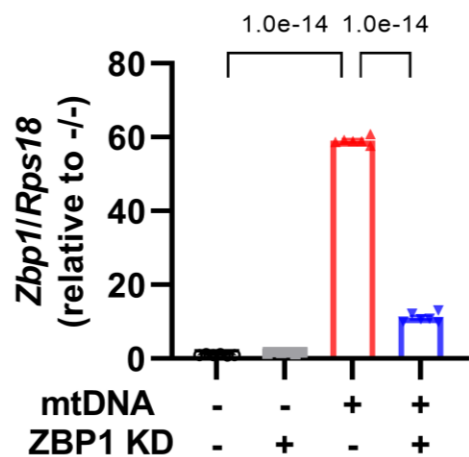

B

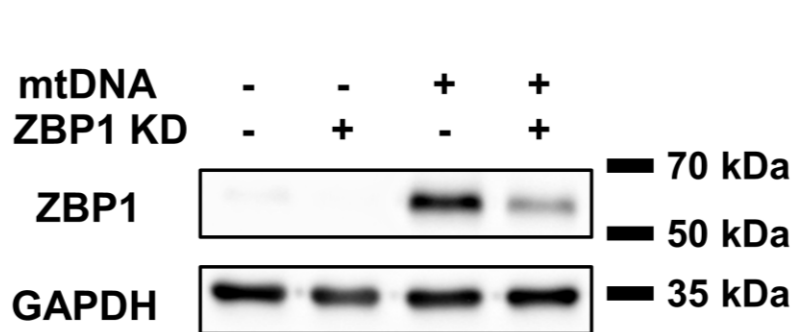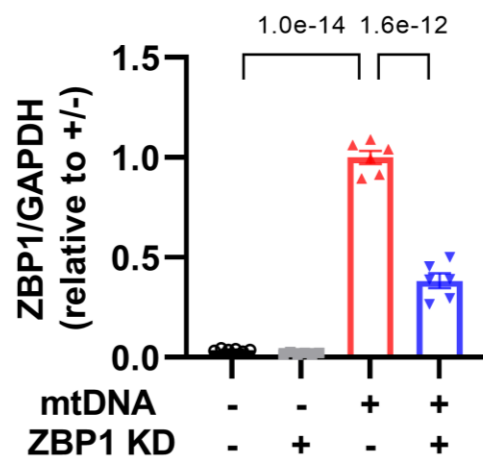

C

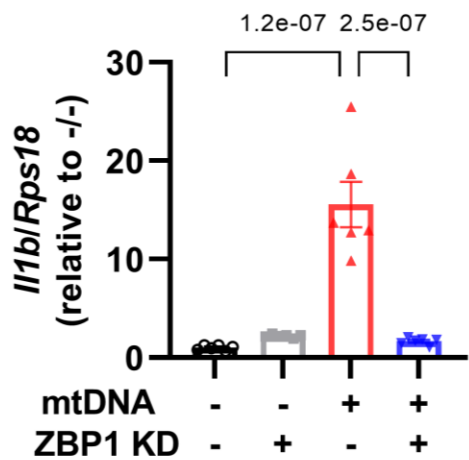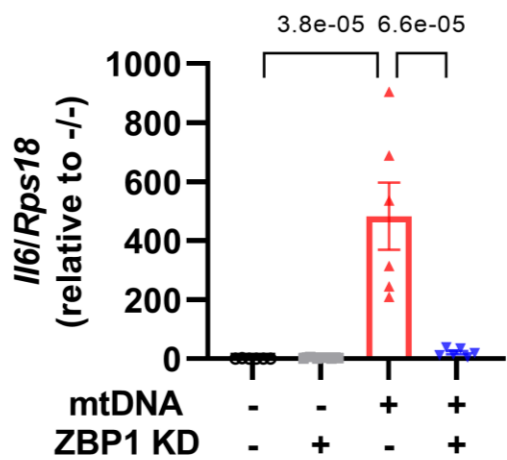

**Figure S3. ZBP1 knockdown attenuates increases in inflammatory cytokines in**

**macrophages treated with mtDNA.** (A) mRNA levels of Zbp1 in indicated groups (n = 6). The experiment was conducted 2 times. (B) Representative immunoblots of ZBP1 and GAPDH in RAW264.7 treated with or without small interfering RNA (siRNA) for ZBP1 (10 nM) in the presence or absence of mtDNA (1000 ng/ml) for 24 hours (n = 6). The experiment was conducted 2 times. (C) mRNA levels of Il1b and Il6 in indicated groups (n = 6). The experiment was conducted 2 times. Error bars denote standard errors. Data were analyzed using the two-way ANOVA followed by Tukey multiple comparisons test.

A

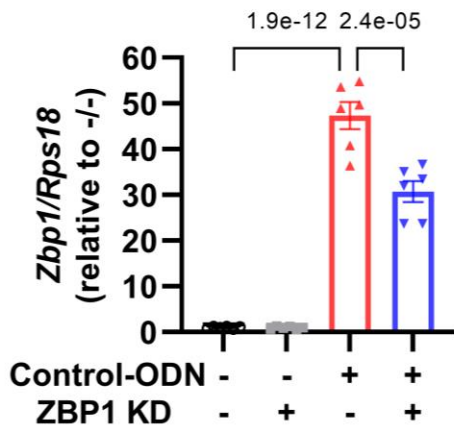

B

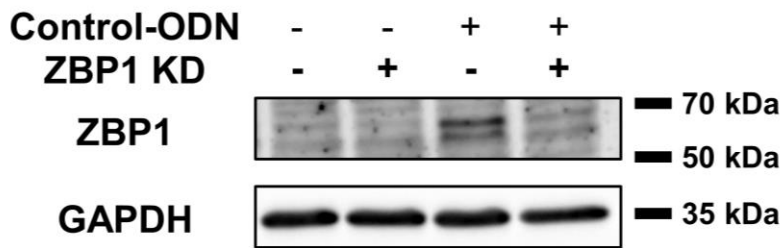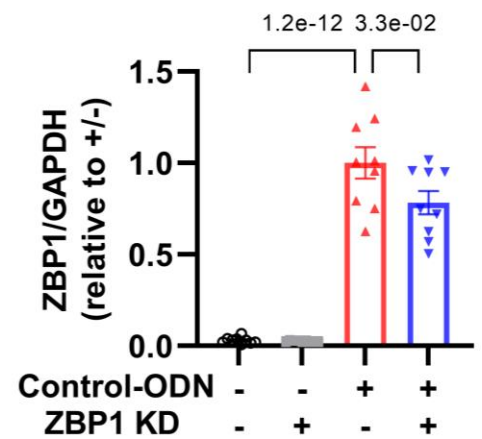

C

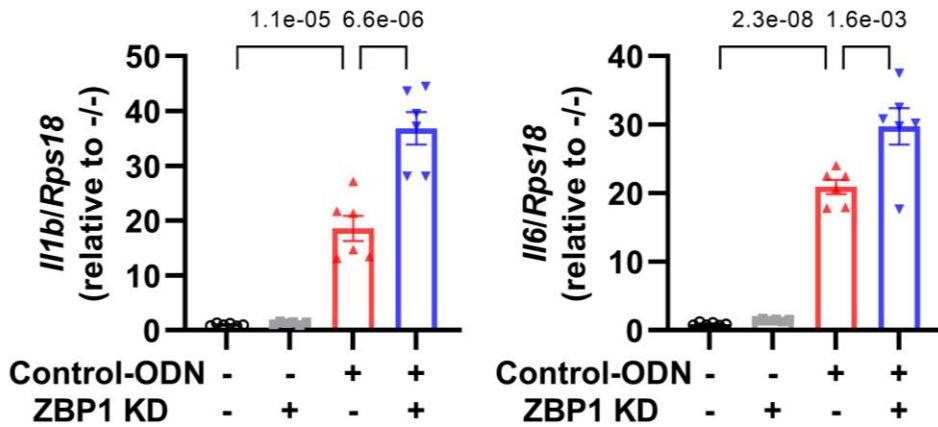

D

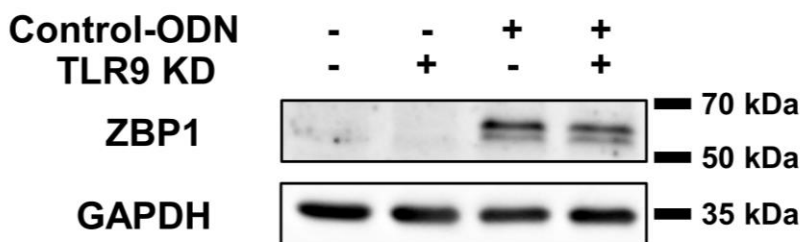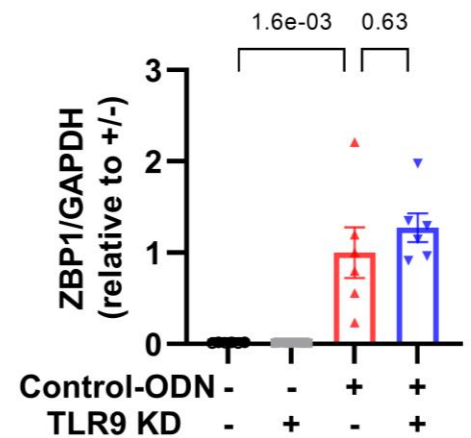

**Figure S4. ZBP1 knockdown attenuates inflammation but TLR9 knockdown does not affect ZBP1 in cardiomyocytes treated with control-ODN.**

(A) mRNA levels of *Zbp1* in NRVMs treated with or without siRNA for ZBP1 (10 nM) in the presence or absence of control-ODN (1000 ng/ml) for 24 hours (n = 6). The experiment was conducted 2 times. (B) Representative immunoblots of ZBP1 and GAPDH in NRVMs treated with or without siRNA for ZBP1 (10 nM) in the presence or absence of control-ODN (1000 ng/ml) for 24 hours (n = 9). The experiment was conducted 3 times. (C) mRNA levels of *Il1b* and *Il6* in NRVMs treated with or without siRNA for ZBP1 (10 nM) in the presence or absence of control-ODN (1000 ng/ml) for 24 hours (n = 6). The experiment was conducted 2 times. (D) Representative immunoblots of ZBP1 and GAPDH in NRVMs treated with or without small interfering RNA (siRNA) for TLR9 (10 nM) in the presence or absence of control-ODN (1000 ng/ml) for 24 hours (n = 6). The experiment was conducted 2 times. Error bars denote standard errors. Data were analyzed using the two-way ANOVA followed by Tukey multiple comparisons test.

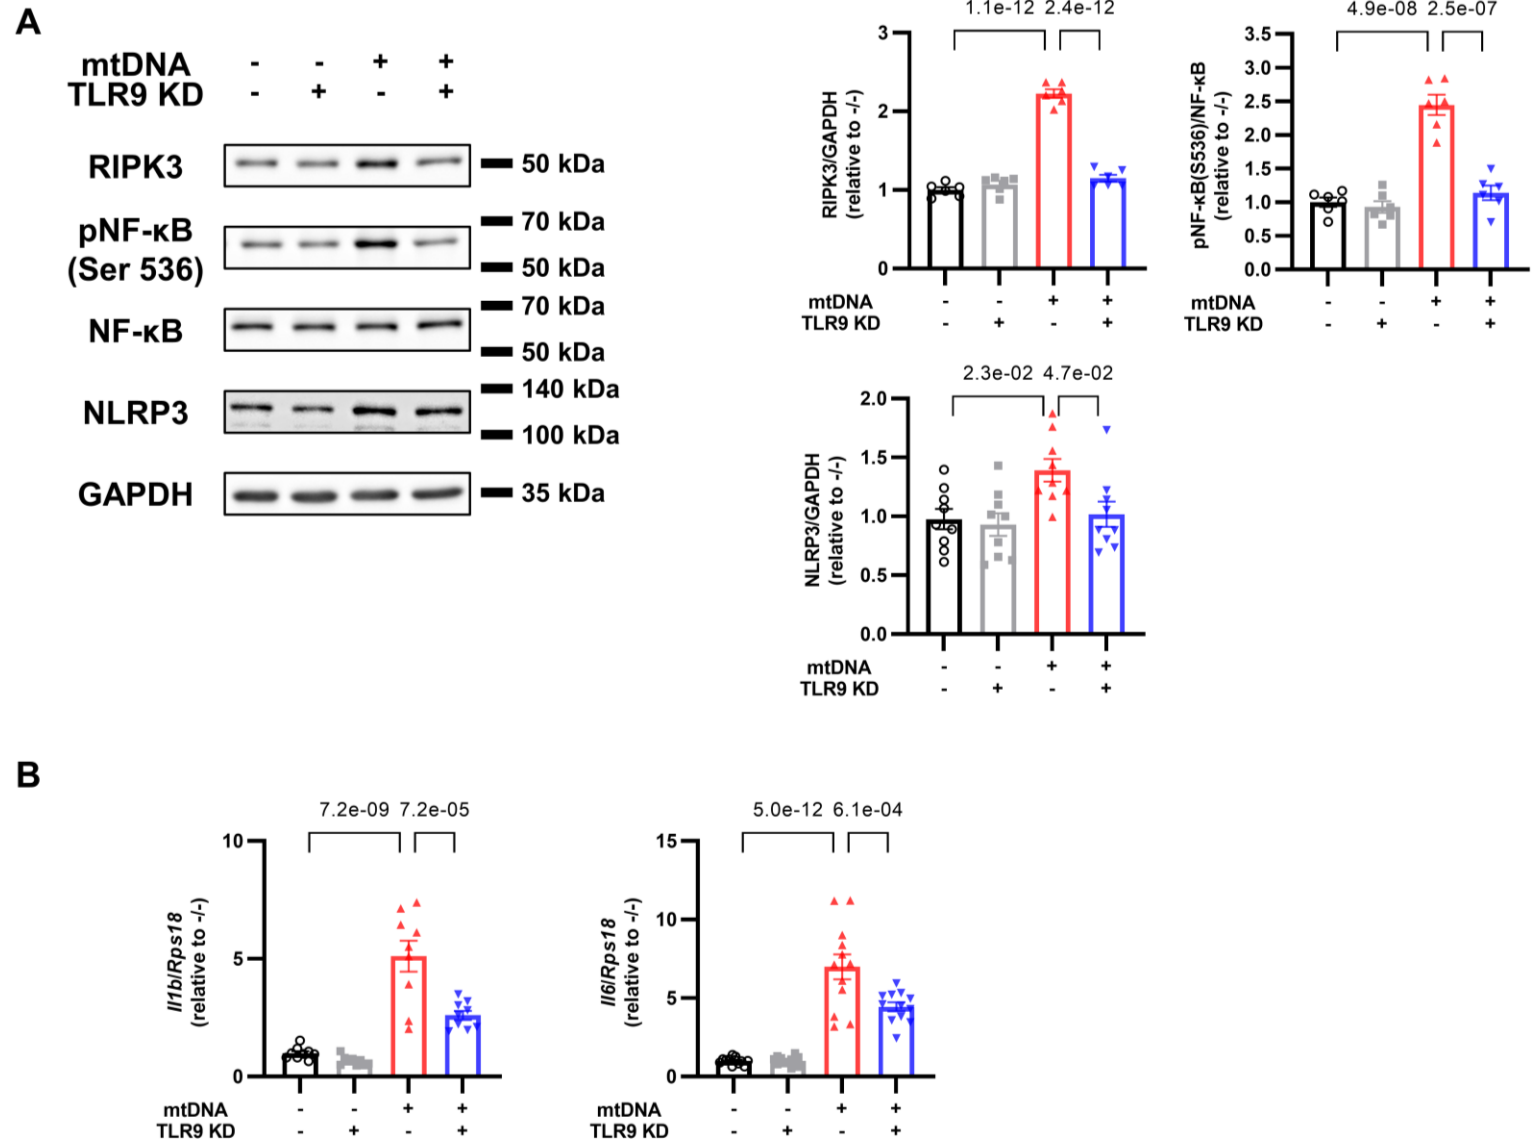

**Figure S5. TLR9 knockdown attenuates downstream inflammatory signaling.**

(A) Representative immunoblots of RIPK3 ( $n = 6$ , number of experiments = 2), phosphorylated NF- $\kappa$ B (Ser 536), NF- $\kappa$ B ( $n = 6$ , number of experiments = 2), NLRP3 ( $n = 9$ , number of experiments = 3), and GAPDH in NRVMs treated with or without siRNA for TLR9 (10 nM) in the presence or absence of mtDNA (1000 ng/ml) for 24 hours. (B) mRNA levels of *Il1b* and *Il6* in NRVMs treated with or without siRNA for TLR9 (10 nM) in the presence or absence of mtDNA (1000 ng/ml) for 24 hours ( $n = 9$ ). The experiment was conducted 3 times. Error bars denote standard errors. Data were analyzed using the two-way ANOVA followed by Tukey multiple comparisons test.

A

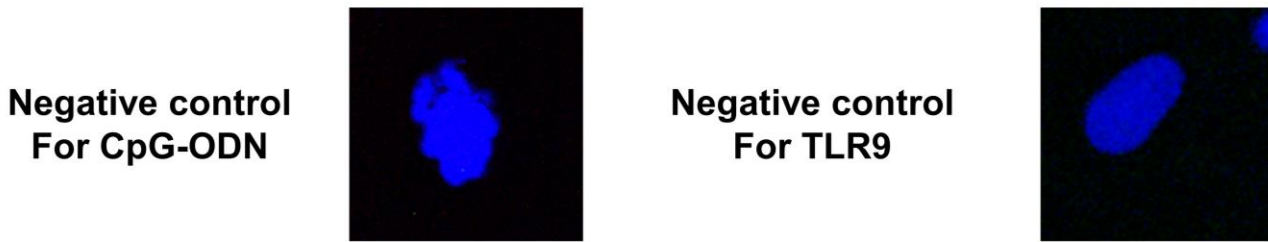

B

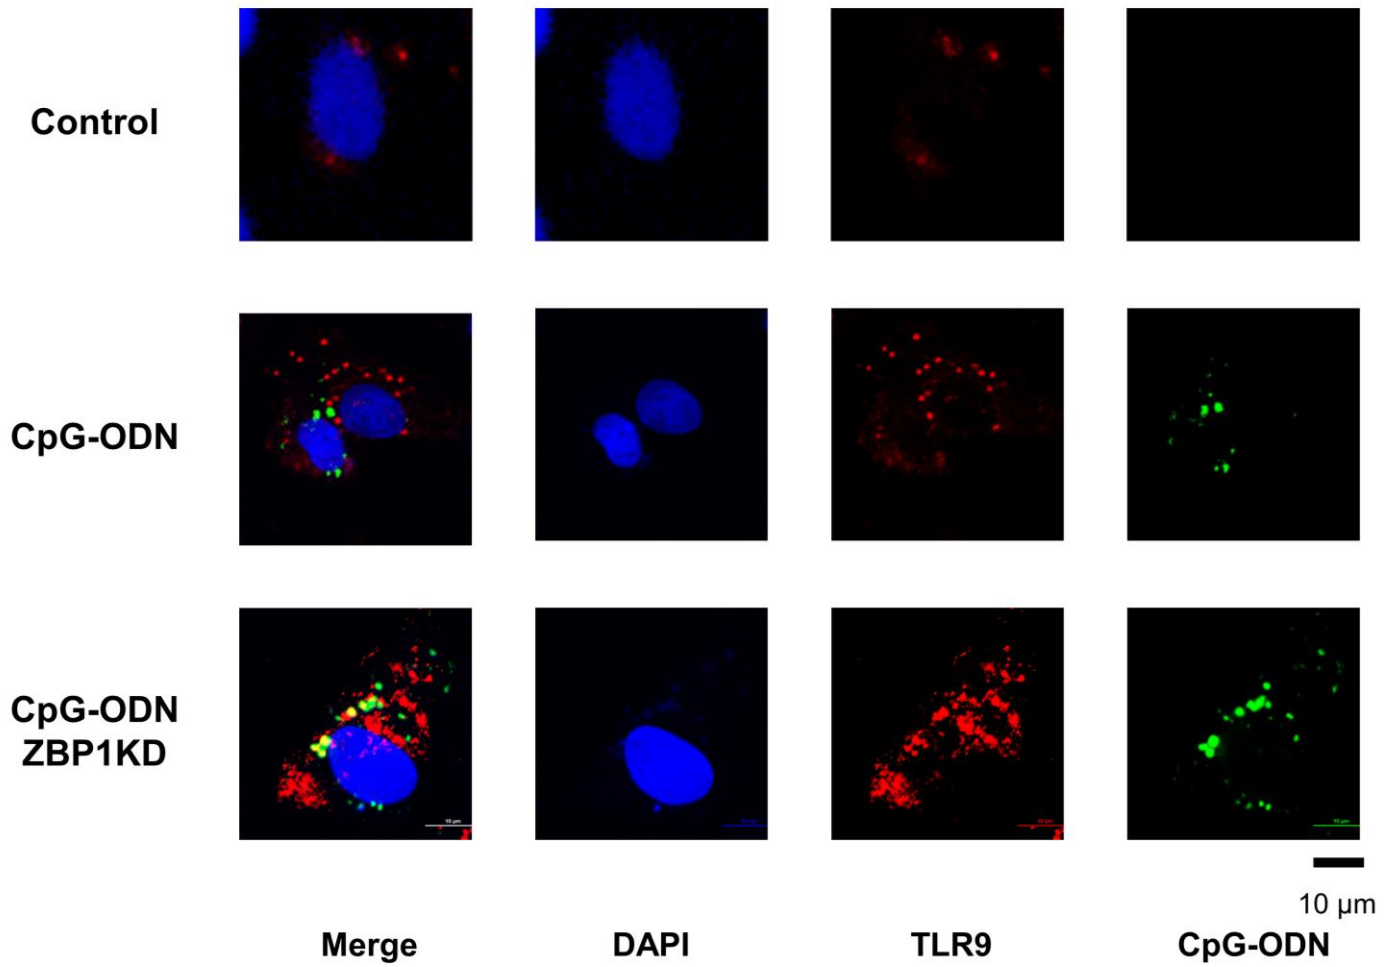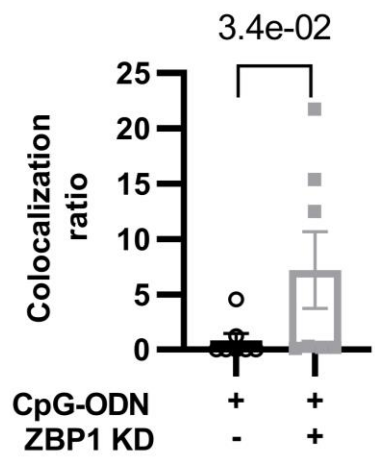



**Figure S6. ZBP1 knockdown increases interaction between TLR9 and CpG-ODN.** (A) Immunofluorescence images of negative control for CpG-ODN (left panel) and TLR9 (right panel). (B) Representative immunofluorescence images in NRVMs treated with or without siRNA for ZBP1 (10 nM) in the presence or absence of FITC labeled-CpG ODN (100 nM) for 24 hours (n = 7). Error bars denote standard errors. Data were analyzed using the Wilcoxon rank sum test.

**A**

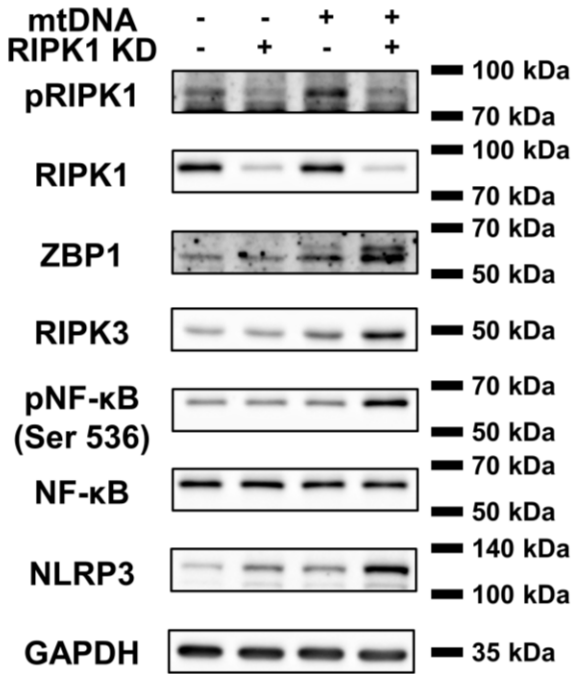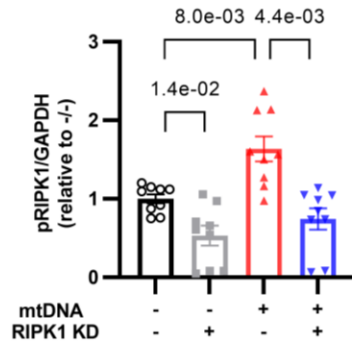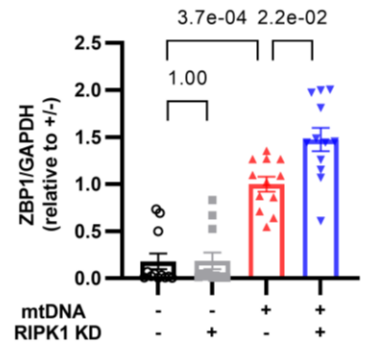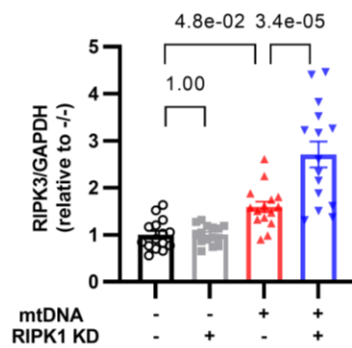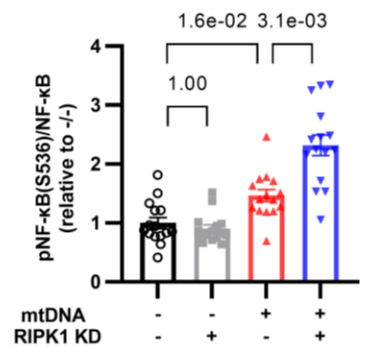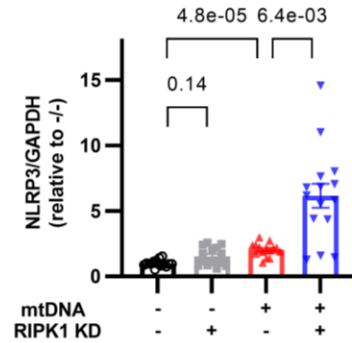

**B**

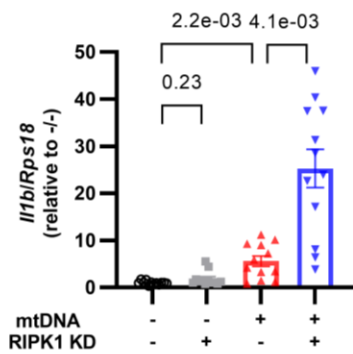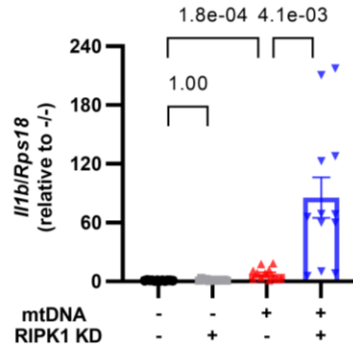

**Figure S7. RIPK1 knockdown suppresses ZBP1 expression and exacerbates downstream inflammatory signaling.**

(A) Representative immunoblots of phosphorylated RIPK1, RIPK1 (n = 9, number of experiments = 3), ZBP1 (n = 12, number of experiments = 4), RIPK3 (n = 15, number of experiments = 5), phosphorylated NF- $\kappa$ B (Ser 536), NF- $\kappa$ B (n = 15, number of experiments = 5), NLRP3 (n = 15, number of experiments = 5), and GAPDH in NRVMs treated with or without siRNA for RIPK1 (5 nM) in the presence or absence of mtDNA (1000 ng/ml) for 24 hours. (B) mRNA levels of *Il1b* and *Il6* in NRVMs treated with or without siRNA for RIPK1 (5 nM) in the presence or absence of mtDNA (1000 ng/ml) for 24 hours (n = 12). The experiment was conducted 4 times. Error bars denote standard errors. Data were analyzed using the Wilcoxon rank sum test (A except for RIPK3, and B; adjust = 3), and two-way ANOVA followed by Tukey multiple comparisons test (A RIPK3).



**Figure S8. STING knockdown suppresses ZBP1 expression and attenuates inflammatory signaling.**

(A) Representative immunoblots in NRVMs treated with or without mtDNA (1000 ng/ml) for 24 hours (n = 6). The experiment was conducted 2 times. (B) mRNA levels of *I11b* (n = 6, number of experiments = 2) and *I16* (n = 12, number of experiments = 4) in NRVMs treated with or without siRNA for STING (1 nM) in the presence or absence of mtDNA (1000 ng/ml) for 24 hours. (C) Representative immunoblots of ZBP1 (n = 6, number of experiments = 2), RIPK3 (n = 12, number of experiments = 4), phosphorylated NF- $\kappa$ B (Ser 536), NF- $\kappa$ B (n = 9, number of experiments = 3), NLRP3 (n = 9, number of experiments = 3), and GAPDH in NRVMs treated with or without siRNA for STING (1 nM) in the presence or absence of mtDNA (1000 ng/ml) for 24 hours. Error bars denote standard errors. Data were analyzed using the Student's t-test (A), Wilcoxon rank sum test (C RIPK3; adjust = 3), and two-way ANOVA followed by Tukey multiple comparisons test (B and C except for RIPK3).



**Figure S9. Animal experiment protocol and pressure overload model.**

(A) Twelve to fourteen-weeks-old wild type or ZBP1 homozygous knockout (KO) mice were subjected to left anterior descending artery ligation or sham operation. Echocardiography, histological analysis, cytosolic DNA measurement, immunoblot, and real time PCR was conducted by using hearts at 3 days after operation. After 28 days, echocardiography and histological analysis was performed. (B) Picro-Sirius Red-stained heart section in each group. Infarct size was assessed with infarct circumference/cardiac circumference in each group 28 days after MI (n = 6). (C and D) The representative echocardiographic color Doppler (C) or 2D images (D) of mice hearts 7 days after transverse aortic constriction or sham operation (n = 5). Error bars denote standard errors. Data were analyzed using the Student's t-test (B and D interventricular septum thickness, left ventricular posterior wall thickness), Wilcoxon rank sum test (D left ventricular weight).

A

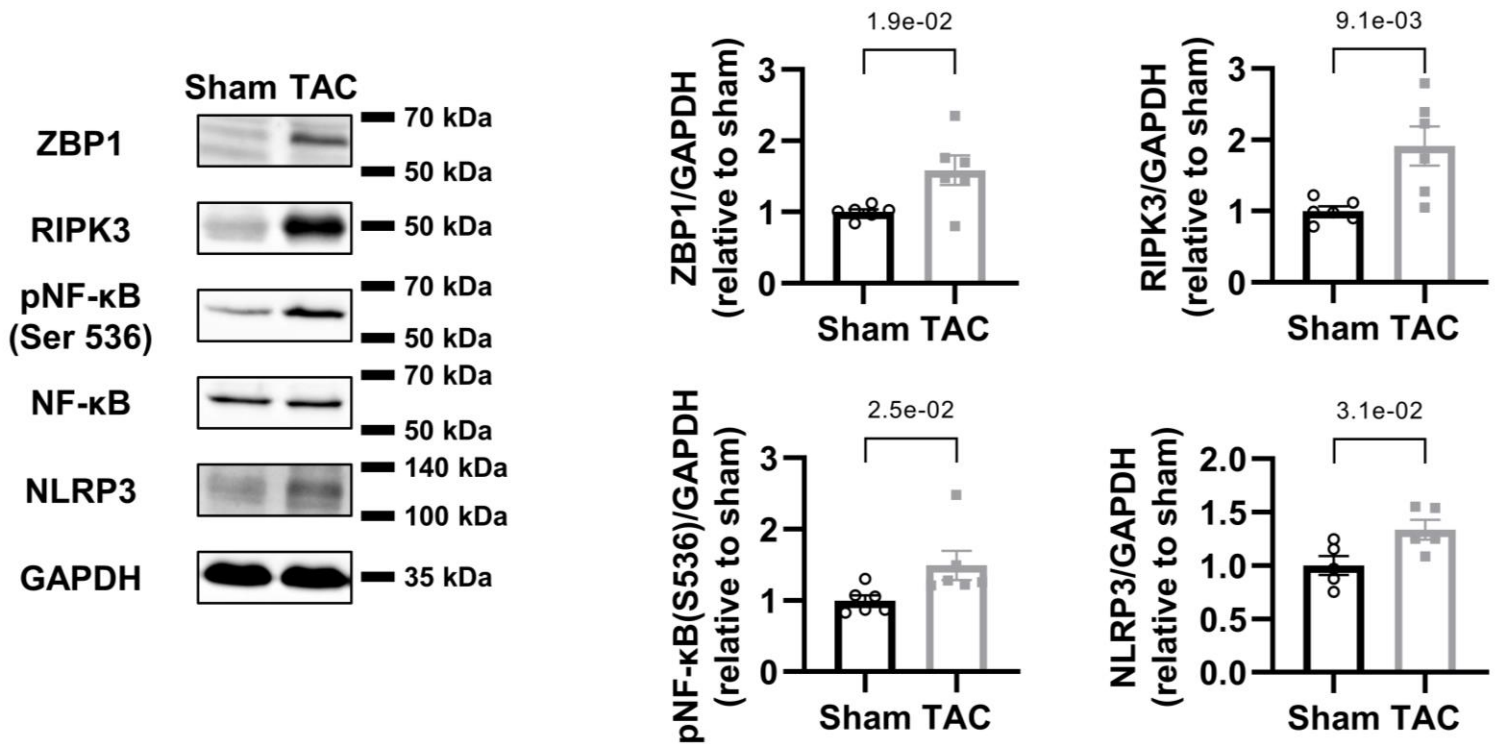

B

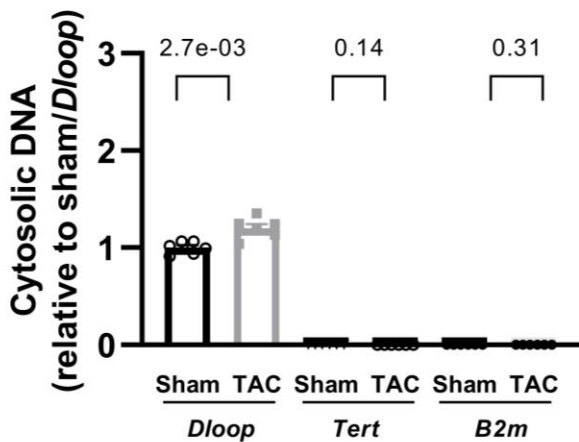

**Figure S10. Myocardial ZBP1 and cytosolic mtDNA are increased in pressure overload model.**

(A) Representative immunoblots of ZBP1, RIPK3, phosphorylated NF-κB (Ser 536), NF-κB, NLRP3, and GAPDH of mice hearts 28 days after transverse aortic constriction (TAC) or sham operation.  $n = 6$  except for NLRP3 ( $n = 5$ ). The experiment was conducted 2 times. (B) DNA levels in this cytosolic fraction was quantified by real-time PCR ( $n = 6$ ). The experiment was conducted 2 times. Data were analyzed using the Student's *t* test except for A NF-κB (Wilcoxon rank sum test).



A

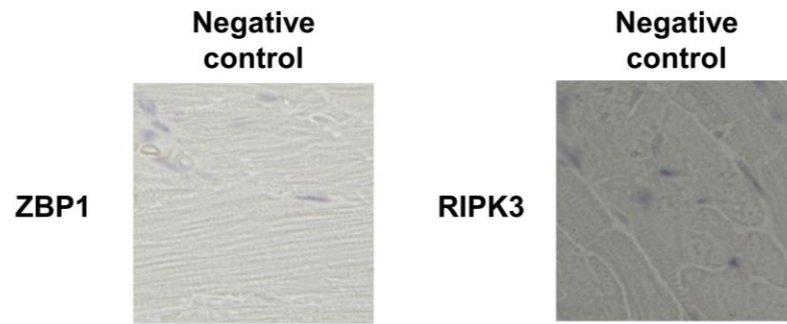

B

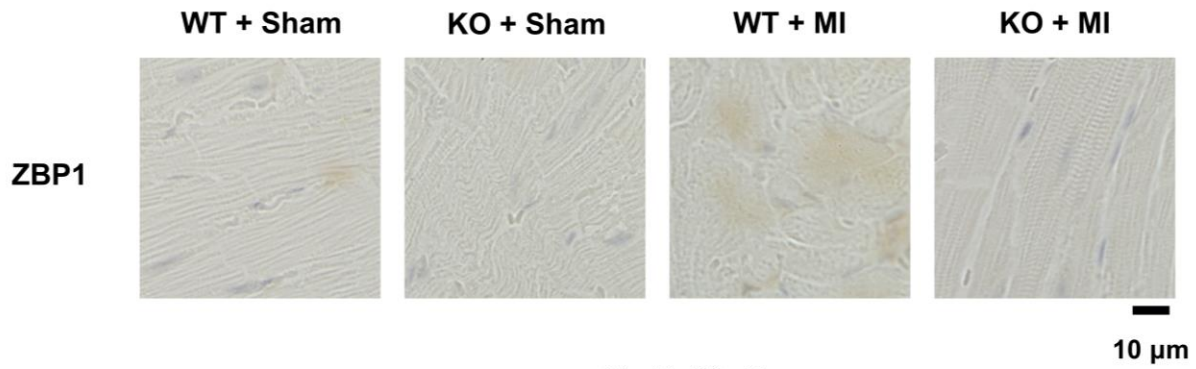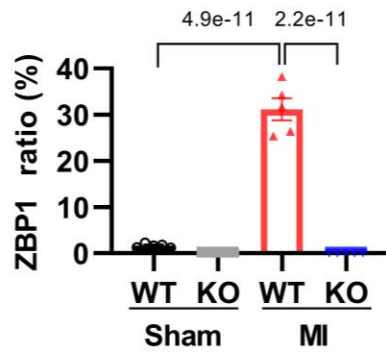

C

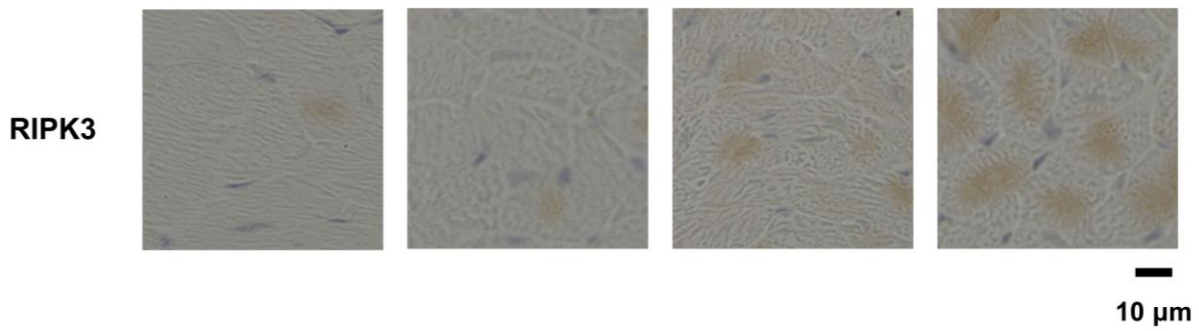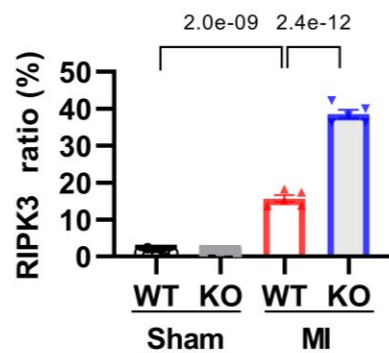

**Figure S11. Assessment of ZBP1 and RIPK3 expression in cardiomyocyte of heart tissues.**

(A) Immunohistochemistry images of negative control for ZBP1 (left panel) and RIPK3 (right panel). (B) The representative immunohistochemistry images of ZBP1 of mice hearts 3 days after MI operation (n = 5). (C) The representative immunohistochemistry images of RIPK3 of mice hearts 3 days after MI operation (n = 5). Error bars denote standard errors. Data were analyzed using the two-way ANOVA followed by Tukey multiple comparisons test.

**A**

**KO + MI**  
Negative control

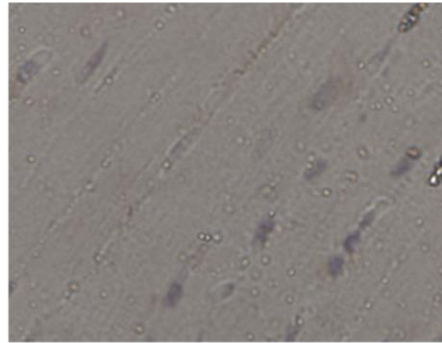

**B**

**WT + Sham**

**KO + Sham**

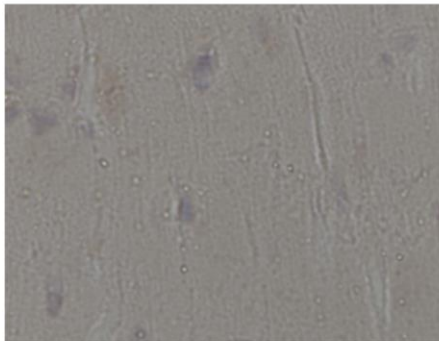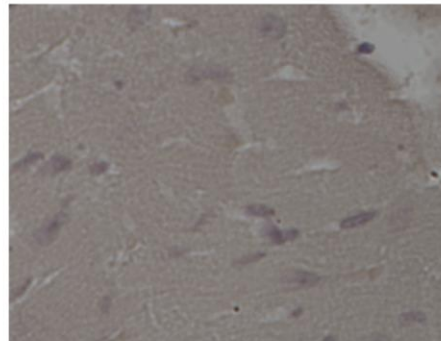

**WT + MI**

**KO + MI**

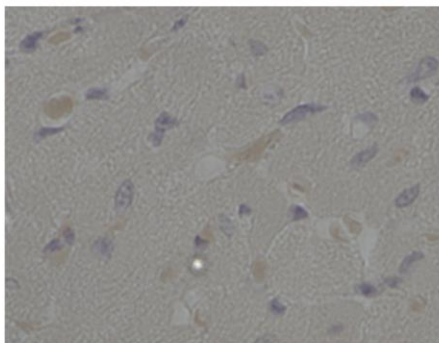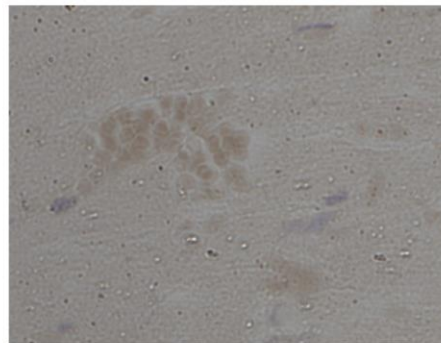

20  $\mu$ m

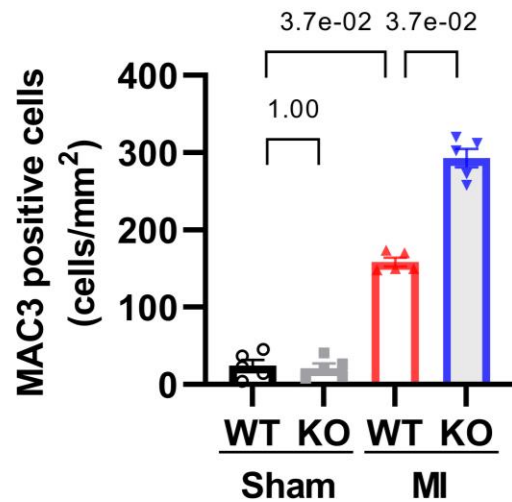

**Figure S12. ZBP1 knockout increases macrophage infiltration into post-MI hearts.**

(A) Immunohistochemistry images of negative control for mac 3 in KO + MI mice. (B) The representative immunohistochemistry images of mac3 of mice hearts 3 days after MI operation (n = 5). Error bars denote standard errors. Data were analyzed using the Wilcoxon rank sum test (adjust = 3).

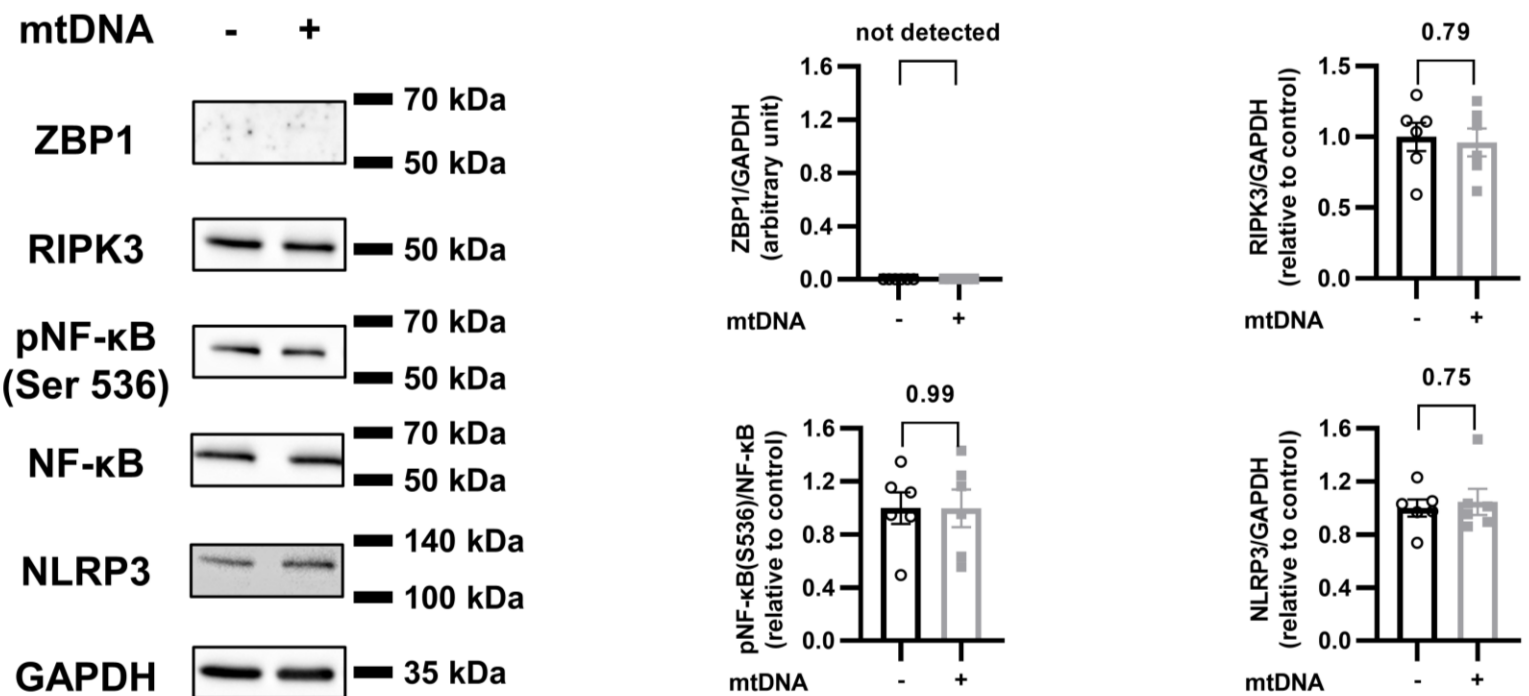

**Figure S13. Administration of mtDNA without lipofectamine does not affect ZBP1 pathway.**

Representative immunoblots in NRVMs treated by mtDNA without lipofectamine (1000 ng/ml) for 24 hours (n = 6). The experiment was conducted 2 times. Error bars denote standard errors.

Data were analyzed using the Student's t-test except for NLRP3 (Wilcoxon rank sum test).

A

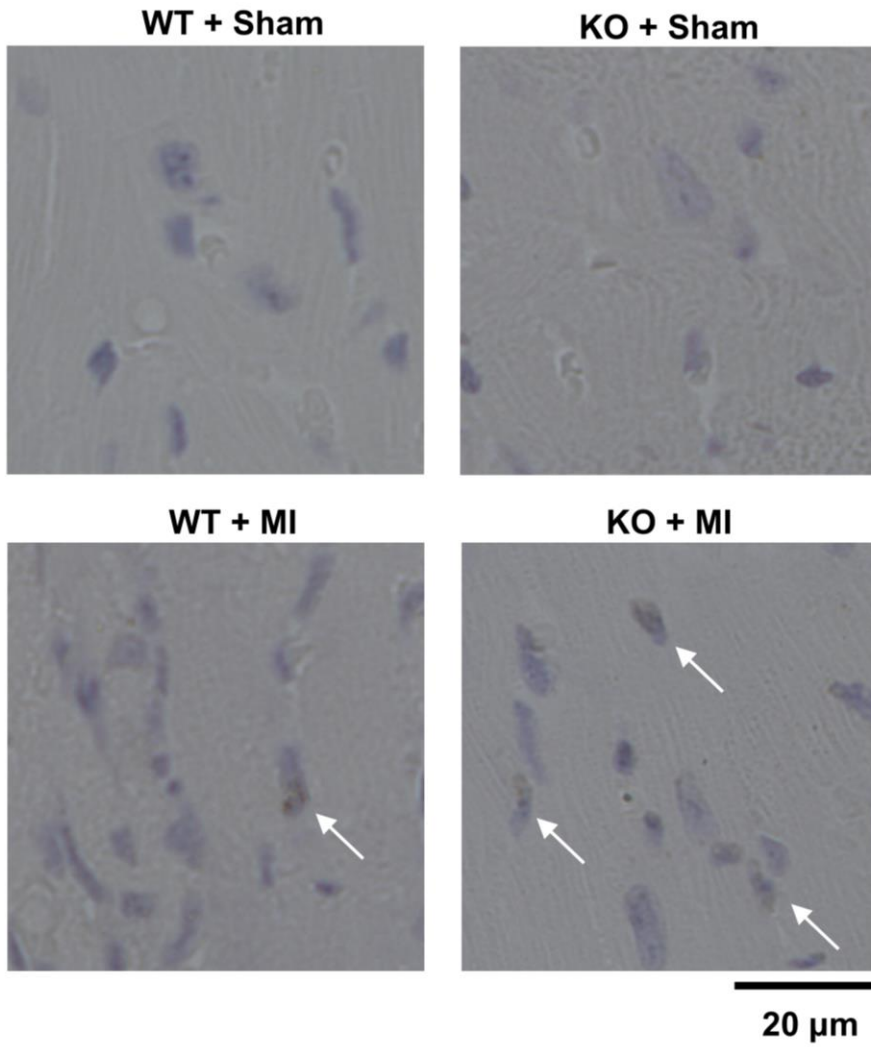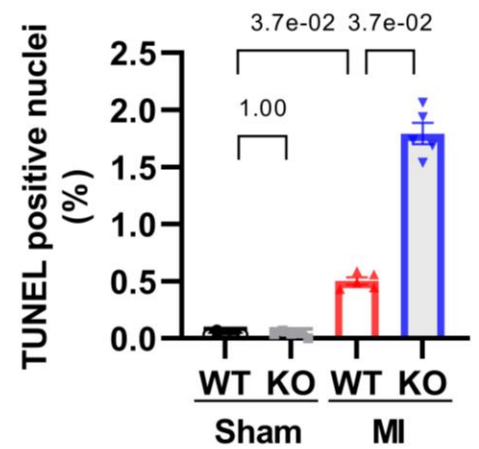

B

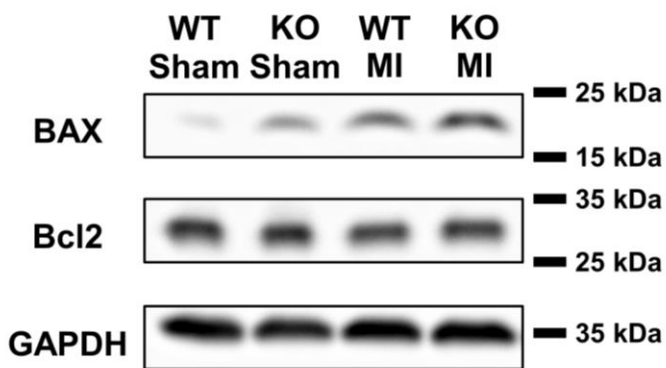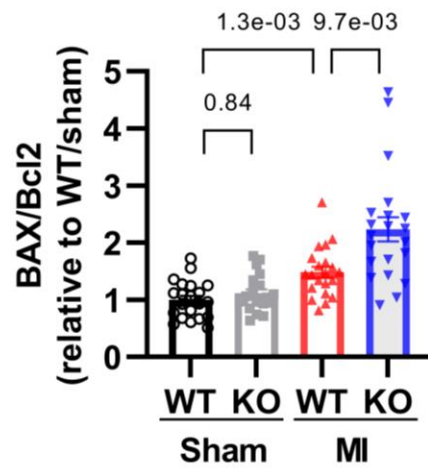

**Figure S14. ZBP1 knockout exacerbates myocardial apoptosis after MI.**

(A) TUNEL stained heart section in each group. Arrow heads indicate TUNEL-positive nuclei.

The percentage of TUNEL-positive nuclei in the heart was assessed in non-infarcted area (n = 5).

(B) Representative immunoblots of BAX, Bcl2, and GAPDH in wild type and ZBP1 knockout mice hearts 3 days after left anterior descending artery ligation or sham operation (n = 21). The experiment was conducted 7 times. Error bars denote standard errors. Data were analyzed using the Wilcoxon rank sum test (adjust = 3).

A

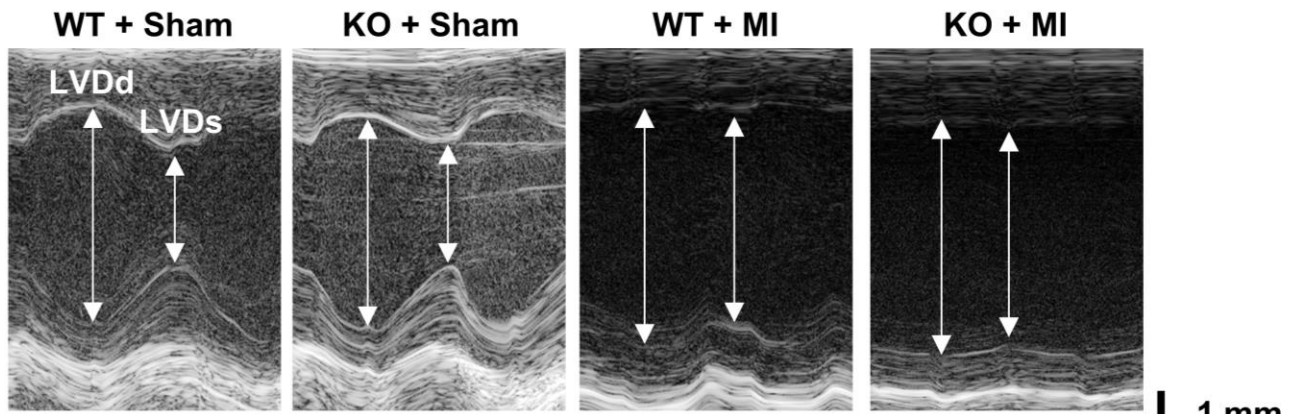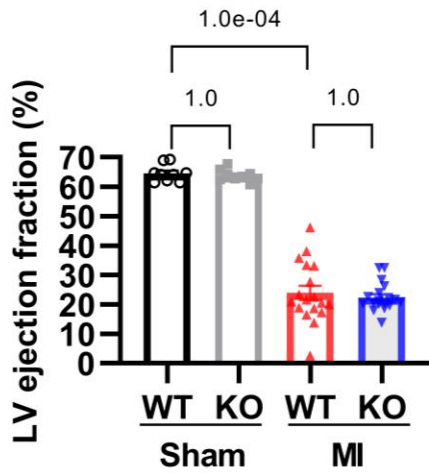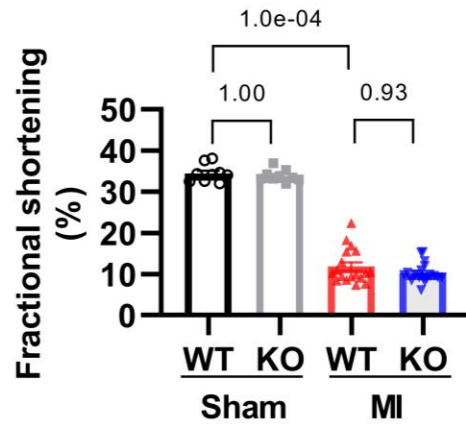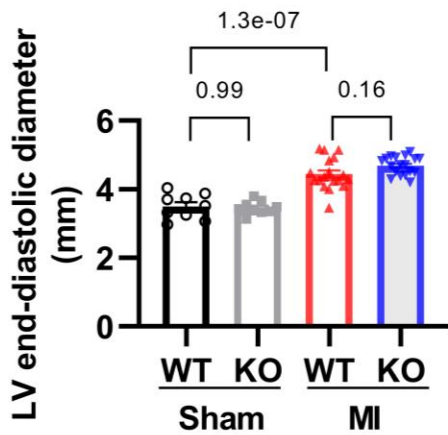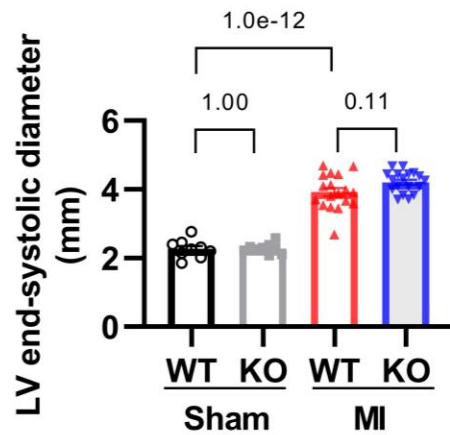

B

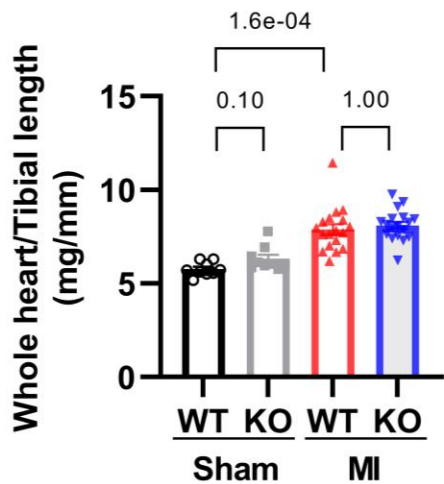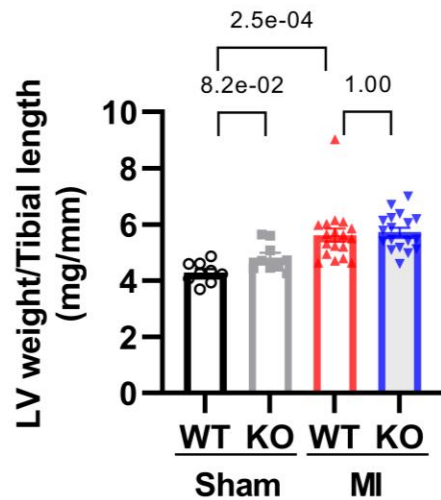



1  
2  
3  
4  
5  
6  
7  
8  
9  
10  
11  
12  
13  
14  
15  
16  
17

**Figure S15. ZBP1 knockout does not change cardiac dysfunction and remodeling in early phase after MI.**

(A) The representative echocardiographic images of ZBP1 knockout (KO) and wild type mice hearts 3 days after left anterior descending artery (LAD) ligation (n = 18) or sham operation (n = 9). Long two-way arrows and short two-way arrows indicate left ventricular end-diastolic diameter (LVDD) and left ventricular end-systolic diameter (LVDS), respectively. (B) Heart weight to tibial length (TL) ratio and left ventricle (LV) weight to TL ratio in each group (n = 18 for LAD ligation and 9 for sham operation). Error bars denote standard errors. Data were analyzed using the Wilcoxon rank sum test (A LVDD and LVDS; adjust = 3), and two-way ANOVA followed by Tukey multiple comparisons test (A LV ejection fraction, fractional shortening, and B).
